# Supplementary material for: Combining two distinctive intermolecular forces in designing ternary co-crystals and molecular salts of 1,3,5-trinitrobenzene, 9-anthracenecarboxylic acid and ten substituted pyridines
Source: Royal Society of Chemistry journal article supplement (doi:10.1039/c9ce00093c), 2019-01-01
Supplement: c9ce00093c1.pdf [file c9ce00093c1.pdf]

## Supplemental Information

# Combining two distinctive intermolecular forces in designing ternary co-crystals and molecular salts of 1,3,5-trinitrobenzene, 9-anthracenecarboxylic acid and ten substituted pyridines.

## Table of Contents

|                                                                       |    |
|-----------------------------------------------------------------------|----|
| Experimental.....                                                     | 2  |
| Elemental Analysis for all complexes .....                            | 3  |
| Crystallographic data for complexes <b>1 - 10</b> .....               | 5  |
| Table of carboxylic/carboxylate bond distances and their ratio's..... | 28 |
| Infra-red spectroscopic data for complexes <b>1 - 10</b> .....        | 34 |
| Raman spectroscopic data for complexes <b>1 - 10</b> .....            | 39 |

## Experimental

All reagents used for synthesis and characterization were of analytical grade, purchased from Sigma-Aldrich, unless otherwise stated. Reagents were used as received, without further purification.

The general synthesis for the multi-component crystals is similar to the one given for compound **1**: 0.01 g TNB (0.046 mmol), 0.01 g 9-anthracene carboxylic acid (0.044 mmol) and 0.004 g pyridine (0.046 mmol) were dissolved in EtOH (60 °C) and stirred for 4 hrs. The solutions were filtered and allowed to crystallize via slow evaporation. Table S1 lists the respective masses for the substituted pyridines for **1-11**. Yields recorded were between 70 and 80%.

**Table S1** Experimental masses of the substituted pyridine component

|           |                                       | mass<br>(0.046 mmol) |
|-----------|---------------------------------------|----------------------|
| <b>1</b>  | 2NH <sub>2</sub> py                   | 4 mg                 |
| <b>2</b>  | 3NH <sub>2</sub> py                   | 4 mg                 |
| <b>3</b>  | 4NH <sub>2</sub> py                   | 4 mg                 |
| <b>4</b>  | 6Br-3NH <sub>2</sub> py               | 8 mg                 |
| <b>5</b>  | 3Br-2NH <sub>2</sub> py               | 8 mg                 |
| <b>6</b>  | 5Br-2NH <sub>2</sub> py               | 8 mg                 |
| <b>7</b>  | 5Cl-2NH <sub>2</sub> py               | 6 mg                 |
| <b>8</b>  | 3NO <sub>2</sub> -2NH <sub>2</sub> py | 6 mg                 |
| <b>9</b>  | 5NO <sub>2</sub> -2NH <sub>2</sub> py | 6 mg                 |
| <b>10</b> | 2,2'-bipy                             | 7 mg                 |

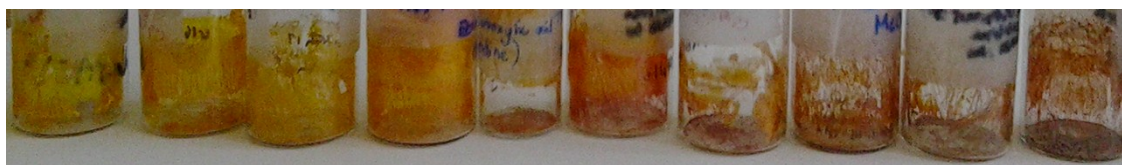

**Figure S1** The ternary complexes arranged visually according to colour from yellow to red.

## Elemental Analysis

Sample Reference

|          |  |  |  |  |  |  |  |
|----------|--|--|--|--|--|--|--|
| <b>1</b> |  |  |  |  |  |  |  |
|----------|--|--|--|--|--|--|--|

| Run no. | Expected values (%) |      |       |  | Results (%)  |              |              |  |
|---------|---------------------|------|-------|--|--------------|--------------|--------------|--|
|         | C                   | H    | N     |  | C            | H            | N            |  |
| 1       | 58.98               | 3.62 | 13.23 |  | <b>59.08</b> | <b>3.653</b> | <b>13.15</b> |  |

Sample Reference

|          |  |  |  |  |  |  |  |
|----------|--|--|--|--|--|--|--|
| <b>2</b> |  |  |  |  |  |  |  |
|----------|--|--|--|--|--|--|--|

| Run no. | Expected values (%) |      |       |  | Results (%)  |              |              |  |
|---------|---------------------|------|-------|--|--------------|--------------|--------------|--|
|         | C                   | H    | N     |  | C            | H            | N            |  |
| 1       | 59.07               | 2.43 | 11.73 |  | <b>58.84</b> | <b>3.314</b> | <b>11.79</b> |  |

Sample Reference

|          |  |  |  |  |  |  |  |
|----------|--|--|--|--|--|--|--|
| <b>3</b> |  |  |  |  |  |  |  |
|----------|--|--|--|--|--|--|--|

| Run no. | Expected values (%) |      |       |   | Results (%)  |              |              |   |
|---------|---------------------|------|-------|---|--------------|--------------|--------------|---|
|         | C                   | H    | N     | S | C            | H            | N            | S |
| 1       | 57.04               | 3.87 | 12.79 |   | <b>57.27</b> | <b>3.828</b> | <b>12.38</b> |   |

Sample Reference

|          |  |  |  |  |  |  |  |
|----------|--|--|--|--|--|--|--|
| <b>4</b> |  |  |  |  |  |  |  |
|----------|--|--|--|--|--|--|--|

| Run no. | Expected values (%) |      |       |  | Results (%)  |              |              |  |
|---------|---------------------|------|-------|--|--------------|--------------|--------------|--|
|         | C                   | H    | N     |  | C            | H            | N            |  |
| 1       | 51.33               | 2.98 | 11.51 |  | <b>51.16</b> | <b>2.838</b> | <b>12.58</b> |  |

Sample Reference

|          |  |  |  |  |  |  |  |
|----------|--|--|--|--|--|--|--|
| <b>5</b> |  |  |  |  |  |  |  |
|----------|--|--|--|--|--|--|--|

| Run no. | Expected values (%) |      |       |  | Results (%)  |              |              |  |
|---------|---------------------|------|-------|--|--------------|--------------|--------------|--|
|         | C                   | H    | N     |  | C            | H            | N            |  |
| 1       | 51.33               | 2.98 | 11.51 |  | <b>51.16</b> | <b>2.474</b> | <b>11.06</b> |  |

Sample Reference

|          |  |  |  |  |  |  |  |
|----------|--|--|--|--|--|--|--|
| <b>6</b> |  |  |  |  |  |  |  |
|----------|--|--|--|--|--|--|--|

| Run no. | Expected values (%) |  |  |  | Results (%) |  |  |  |
|---------|---------------------|--|--|--|-------------|--|--|--|
|---------|---------------------|--|--|--|-------------|--|--|--|

|   |       |      |       |  |              |              |              |  |
|---|-------|------|-------|--|--------------|--------------|--------------|--|
|   | C     | H    | N     |  | C            | H            | N            |  |
| 1 | 51.33 | 2.98 | 11.51 |  | <b>51.48</b> | <b>2.439</b> | <b>10.65</b> |  |

Sample Reference

|          |  |  |  |  |  |  |  |
|----------|--|--|--|--|--|--|--|
| <b>7</b> |  |  |  |  |  |  |  |
|----------|--|--|--|--|--|--|--|

| Run no. | Expected values (%) |      |       |  | Results (%)  |              |              |  |
|---------|---------------------|------|-------|--|--------------|--------------|--------------|--|
|         | C                   | H    | N     |  | C            | H            | N            |  |
| 1       | 55.38               | 3.16 | 12.42 |  | <b>55.10</b> | <b>3.263</b> | <b>12.65</b> |  |

Sample Reference

|          |  |  |  |  |  |  |  |
|----------|--|--|--|--|--|--|--|
| <b>8</b> |  |  |  |  |  |  |  |
|----------|--|--|--|--|--|--|--|

| Run no. | Expected values (%) |      |       |  | Results (%)  |              |              |  |
|---------|---------------------|------|-------|--|--------------|--------------|--------------|--|
|         | C                   | H    | N     |  | C            | H            | N            |  |
| 1       | 54.36               | 3.16 | 14.63 |  | <b>54.38</b> | <b>3.055</b> | <b>14.21</b> |  |

Sample Reference

|          |  |  |  |  |  |  |  |
|----------|--|--|--|--|--|--|--|
| <b>9</b> |  |  |  |  |  |  |  |
|----------|--|--|--|--|--|--|--|

| Run no. | Expected values (%) |      |       |  | Results (%)  |              |              |  |
|---------|---------------------|------|-------|--|--------------|--------------|--------------|--|
|         | C                   | H    | N     |  | C            | H            | N            |  |
| 1       | 54.36               | 3.16 | 14.63 |  | <b>54.62</b> | <b>2.744</b> | <b>14.65</b> |  |

Sample Reference

|           |  |  |  |  |  |  |  |
|-----------|--|--|--|--|--|--|--|
| <b>10</b> |  |  |  |  |  |  |  |
|-----------|--|--|--|--|--|--|--|

| Run no. | Expected values (%) |      |       |  | Results (%)  |              |              |  |
|---------|---------------------|------|-------|--|--------------|--------------|--------------|--|
|         | C                   | H    | N     |  | C            | H            | N            |  |
| 1       | 62.95               | 3.58 | 11.84 |  | <b>63.24</b> | <b>3.295</b> | <b>12.89</b> |  |

## Crystallographic data for complexes 1 - 10

All data collections for **1-10** were obtained on a Bruker Venture D8 Photon CMOS diffractometer with graphite-monochromated MoK $\alpha_1$  ( $\lambda = 0.71073$  Å) radiation at 173 K using an Oxford Cryostream Plus cooler. The collection method involved  $\omega$ -scans with a 0.5° width. *SAINT+* version 6.02.6<sup>1</sup> software was used for data reduction and *SADABS*<sup>2</sup> was used to make empirical absorption corrections. The crystal structures were solved using direct methods on *SHELXS-97*.<sup>3</sup> Non-hydrogen atoms were first refined isotropically, followed by anisotropic refinement by full matrix least-squares calculations based on  $F^2$  using *SHELXL-2017*.<sup>3</sup> C-bound H atoms were located in the difference map, then positioned geometrically and were allowed to ride on their respective parent atoms, with thermal displacement parameters 1.2 times of the parent C atom. Where possible, the coordinates and isotropic displacement parameters of the N-bound and O-bound H atoms involved in hydrogen bonding interactions were allowed to refine freely. Diagrams and publication material were generated using *WinGX*,<sup>4</sup> *ORTEP-3*,<sup>4</sup> *PLATON*<sup>5</sup> and *MERCURY*.<sup>6</sup>

1. SAINT+, Version 6.02 (Includes XPREP and SADABS); Bruker AXS Inc: Madison, Wisconsin, USA, 2004.
2. Krause, L., Herbst-Irmer, R., Sheldrick, G. M. & Stalke, D. (2015). *J. Appl. Cryst.* **48**, 3–10.
3. Sheldrick, G. M., *Acta Crystallogr., Sect. C.* 2015, 71 (Pt 1), 3-8.
4. Farrugia, L., *J. Appl. Crystallogr.* 2012, 45 (4), 849-854.
5. Spek, A., *Acta Crystallogr., Sect. D.* 2009, 65 (2), 148-155.
6. Macrae C.F., Edgington P.R., McCabe P., Pidcock E., Shields G.P., Taylor R., Towler M., van de Streek J., *J. Appl. Cryst.* 2006, **39-3**, 453.

**Table S2.** Crystal data and structure refinement for **1 (CSD Code: 1402877)**.

|                                   |                                             |                              |
|-----------------------------------|---------------------------------------------|------------------------------|
| Identification code               | v14hth8_tp-1                                |                              |
| Empirical formula                 | C26 H19 N5 O8                               |                              |
| Formula weight                    | 529.46                                      |                              |
| Temperature                       | 173(2) K                                    |                              |
| Wavelength                        | 0.71073 Å                                   |                              |
| Crystal system                    | Monoclinic                                  |                              |
| Space group                       | P 21/c                                      |                              |
| Unit cell dimensions              | a = 6.8850(11) Å                            | $\alpha = 90^\circ$ .        |
|                                   | b = 13.936(2) Å                             | $\beta = 102.600(5)^\circ$ . |
|                                   | c = 24.919(3) Å                             | $\gamma = 90^\circ$ .        |
| Volume                            | 2333.4(6) Å <sup>3</sup>                    |                              |
| Z                                 | 4                                           |                              |
| Density (calculated)              | 1.507 Mg/m <sup>3</sup>                     |                              |
| Absorption coefficient            | 0.115 mm <sup>-1</sup>                      |                              |
| F(000)                            | 1096                                        |                              |
| Crystal size                      | 0.280 x 0.120 x 0.050 mm <sup>3</sup>       |                              |
| Theta range for data collection   | 2.907 to 25.499°.                           |                              |
| Index ranges                      | -8 ≤ h ≤ 8, -16 ≤ k ≤ 16, -30 ≤ l ≤ 30      |                              |
| Reflections collected             | 29056                                       |                              |
| Independent reflections           | 4373 [R(int) = 0.1282]                      |                              |
| Completeness to theta = 25.242°   | 99.8 %                                      |                              |
| Refinement method                 | Full-matrix least-squares on F <sup>2</sup> |                              |
| Data / restraints / parameters    | 4373 / 0 / 361                              |                              |
| Goodness-of-fit on F <sup>2</sup> | 1.053                                       |                              |
| Final R indices [I > 2σ(I)]       | R1 = 0.0856, wR2 = 0.2511                   |                              |
| R indices (all data)              | R1 = 0.1083, wR2 = 0.2693                   |                              |
| Extinction coefficient            | n/a                                         |                              |
| Largest diff. peak and hole       | 0.522 and -0.560 e.Å <sup>-3</sup>          |                              |

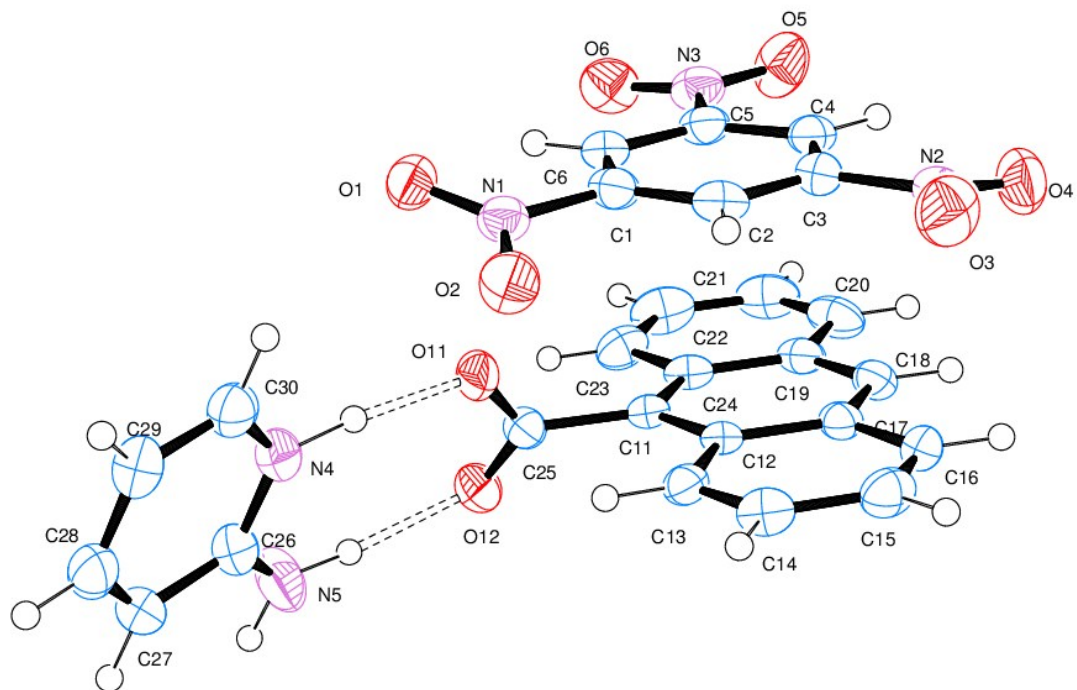

**Figure S2** Asymmetric unit of TNB:9-anthroic acid:2-aminopyridine (**1**) (1:1:1), indicating the numbering scheme, ellipsoids at 50 % probability. Hydrogen bonding interactions shown with a dashed bond.

**Table S3.** Hydrogen bonds for **1** [ $\text{\AA}$  and  $^\circ$ ].

| D-H...A                | d(D-H)  | d(H...A) | d(D...A) | $\angle$ (DHA) |
|------------------------|---------|----------|----------|----------------|
| N(21)-H(21)...O(11)    | 0.88    | 1.85     | 2.712(6) | 167            |
| N(22)-H(22A)...O(12)   | 0.95(8) | 1.90(9)  | 2.841(6) | 174(2)         |
| N(22)-H(22B)...O(12)#1 | 0.92(6) | 1.95(6)  | 2.859(7) | 169(5)         |

Symmetry transformations used to generate equivalent atoms:

#1  $-x,-y+1,-z+1$

**Table S4.** Crystal data and structure refinement for **2 (CSD Code: 1402879)**.

|                                   |                                                                |                  |
|-----------------------------------|----------------------------------------------------------------|------------------|
| Identification code               | mo_v14hth15_0m                                                 |                  |
| Empirical formula                 | C <sub>47</sub> H <sub>32</sub> N <sub>8</sub> O <sub>16</sub> |                  |
| Formula weight                    | 964.80                                                         |                  |
| Temperature                       | 173(2) K                                                       |                  |
| Wavelength                        | 0.71073 Å                                                      |                  |
| Crystal system                    | Monoclinic                                                     |                  |
| Space group                       | P 21/n                                                         |                  |
| Unit cell dimensions              | a = 13.6779(11) Å                                              | α = 90°.         |
|                                   | b = 18.3499(14) Å                                              | β = 102.983(3)°. |
|                                   | c = 17.2493(14) Å                                              | γ = 90°.         |
| Volume                            | 4218.7(6) Å <sup>3</sup>                                       |                  |
| Z                                 | 4                                                              |                  |
| Density (calculated)              | 1.519 Mg/m <sup>3</sup>                                        |                  |
| Absorption coefficient            | 0.117 mm <sup>-1</sup>                                         |                  |
| F(000)                            | 1992                                                           |                  |
| Crystal size                      | 0.560 x 0.360 x 0.170 mm <sup>3</sup>                          |                  |
| Theta range for data collection   | 2.811 to 25.498°.                                              |                  |
| Index ranges                      | -16 ≤ h ≤ 16, -21 ≤ k ≤ 22, -20 ≤ l ≤ 20                       |                  |
| Reflections collected             | 44511                                                          |                  |
| Independent reflections           | 7826 [R(int) = 0.0352]                                         |                  |
| Completeness to theta = 25.242°   | 99.5 %                                                         |                  |
| Refinement method                 | Full-matrix least-squares on F <sup>2</sup>                    |                  |
| Data / restraints / parameters    | 7826 / 0 / 649                                                 |                  |
| Goodness-of-fit on F <sup>2</sup> | 1.004                                                          |                  |
| Final R indices [I > 2σ(I)]       | R1 = 0.0474, wR2 = 0.1378                                      |                  |
| R indices (all data)              | R1 = 0.0648, wR2 = 0.1550                                      |                  |
| Extinction coefficient            | n/a                                                            |                  |
| Largest diff. peak and hole       | 0.390 and -0.252 e.Å <sup>-3</sup>                             |                  |



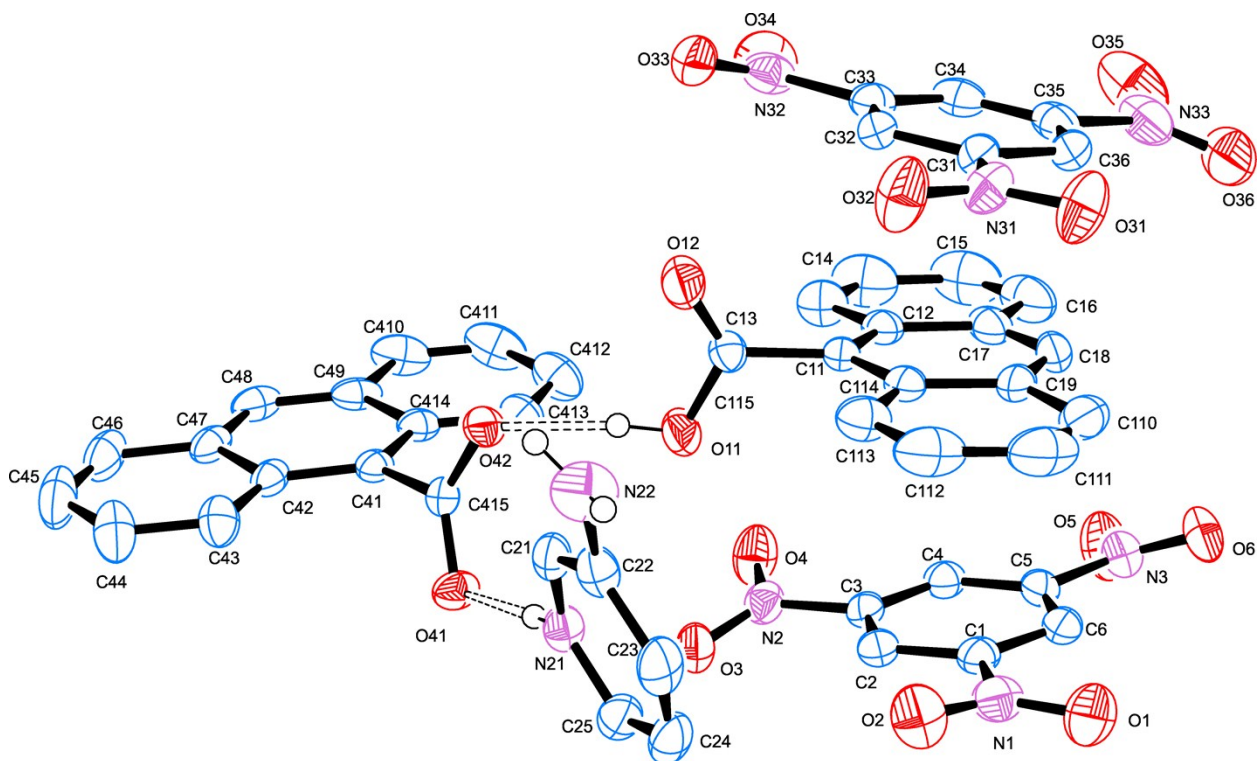

**Figure S3** Asymmetric unit of TNB:9-anthroic acid:3-aminopyridine (**2**) (2:2:1), indicating the numbering scheme, ellipsoids at 50 % probability, only selected hydrogen atoms shown. Hydrogen bonding interactions shown with a dashed bond.

**Table S7.** Hydrogen bonds for **2** [Å and °].

| D-H...A                | d(D-H)  | d(H...A) | d(D...A)   | <(DHA) |
|------------------------|---------|----------|------------|--------|
| O(11)-H(11)...O(42)    | 0.84    | 1.74     | 2.5755(19) | 172    |
| N(21)-H(21A)...O(41)   | 0.88    | 1.71     | 2.581(2)   | 168    |
| N(22)-H(22B)...O(12)#1 | 0.80(3) | 2.52(3)  | 3.087(3)   | 129(3) |

Symmetry transformations used to generate equivalent atoms:

#1  $-x+2, -y, -z+1$

**Table S6.** Crystal data and structure refinement for **3** (CSD Code: 1402880).

|                                   |                                                               |                 |
|-----------------------------------|---------------------------------------------------------------|-----------------|
| Identification code               | mo_v14hth13_0m                                                |                 |
| Empirical formula                 | C <sub>26</sub> H <sub>21</sub> N <sub>5</sub> O <sub>9</sub> |                 |
| Formula weight                    | 547.48                                                        |                 |
| Temperature                       | 173(2) K                                                      |                 |
| Wavelength                        | 0.71073 Å                                                     |                 |
| Crystal system                    | Triclinic                                                     |                 |
| Space group                       | P -1                                                          |                 |
| Unit cell dimensions              | a = 7.234(2) Å                                                | α = 89.798(6)°. |
|                                   | b = 9.378(3) Å                                                | β = 88.075(6)°. |
|                                   | c = 35.927(11) Å                                              | γ = 87.452(6)°. |
| Volume                            | 2433.6(13) Å <sup>3</sup>                                     |                 |
| Z                                 | 4                                                             |                 |
| Density (calculated)              | 1.494 Mg/m <sup>3</sup>                                       |                 |
| Absorption coefficient            | 0.115 mm <sup>-1</sup>                                        |                 |
| F(000)                            | 1136                                                          |                 |
| Crystal size                      | 0.300 x 0.110 x 0.040 mm <sup>3</sup>                         |                 |
| Theta range for data collection   | 2.836 to 25.499°.                                             |                 |
| Index ranges                      | -8 ≤ h ≤ 8, -11 ≤ k ≤ 11, -43 ≤ l ≤ 43                        |                 |
| Reflections collected             | 24395                                                         |                 |
| Independent reflections           | 8989 [R(int) = 0.0506]                                        |                 |
| Completeness to theta = 25.242°   | 99.1 %                                                        |                 |
| Refinement method                 | Full-matrix least-squares on F <sup>2</sup>                   |                 |
| Data / restraints / parameters    | 8989 / 0 / 761                                                |                 |
| Goodness-of-fit on F <sup>2</sup> | 1.121                                                         |                 |
| Final R indices [I > 2σ(I)]       | R <sub>1</sub> = 0.0746, wR <sub>2</sub> = 0.1680             |                 |
| R indices (all data)              | R <sub>1</sub> = 0.1169, wR <sub>2</sub> = 0.1837             |                 |
| Extinction coefficient            | n/a                                                           |                 |
| Largest diff. peak and hole       | 0.500 and -0.254 e.Å <sup>-3</sup>                            |                 |

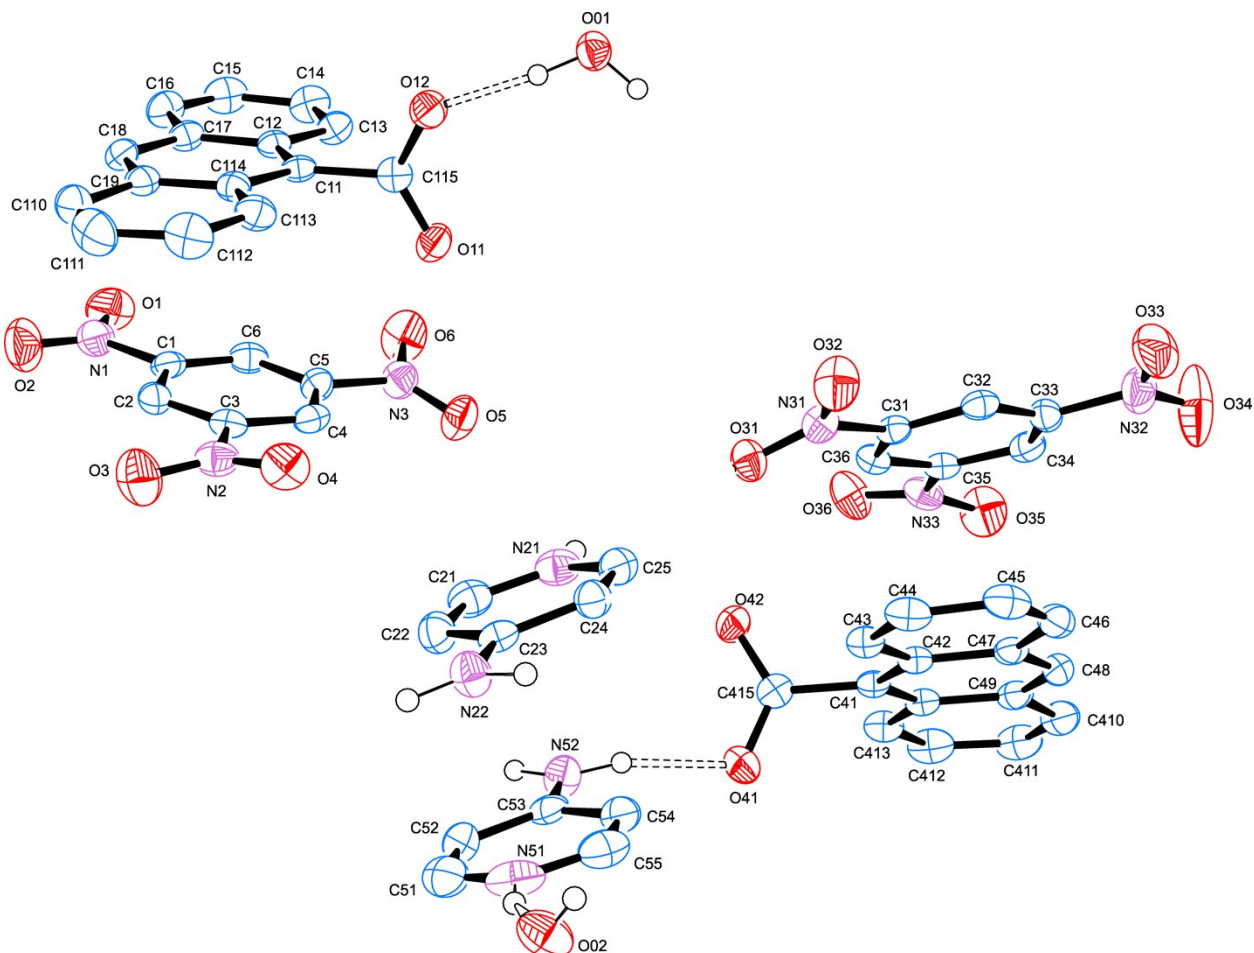

**Figure S4** Asymmetric unit of TNB:9-anthroic acid:4-aminopyridine water solvate (**3**) (1:1:1), indicating the numbering scheme, ellipsoids at 50 % probability, only selected hydrogen atoms shown. Hydrogen bonding interactions shown with a dashed bond.

**Table S7.** Hydrogen bonds for **3** [ $\text{\AA}$  and  $^\circ$ ].

| D-H...A                | d(D-H)  | d(H...A) | d(D...A) | $\angle(\text{DHA})$ |
|------------------------|---------|----------|----------|----------------------|
| O(01)-H(01A)...O(12)   | 0.95(5) | 1.73(5)  | 2.651(4) | 163(4)               |
| O(02)-H(02B)...O(41)#1 | 0.81(5) | 2.05(5)  | 2.854(5) | 176(5)               |
| O(02)-H(02A)...O(01)#2 | 0.90(6) | 2.01(6)  | 2.887(5) | 167(5)               |
| O(01)-H(01B)...O(42)#3 | 0.89(5) | 1.94(6)  | 2.818(4) | 167(5)               |
| N(21)-H(21A)...O(01)#4 | 0.87(5) | 1.91(5)  | 2.772(5) | 168(4)               |
| N(22)-H(22B)...O(11)#5 | 0.92(4) | 2.14(4)  | 2.990(5) | 153(4)               |
| N(22)-H(22A)...O(42)#1 | 0.94(5) | 1.98(5)  | 2.904(5) | 168(4)               |
| N(51)-H(51A)...O(02)   | 1.01(6) | 1.78(6)  | 2.770(5) | 165(5)               |
| N(52)-H(52A)...O(41)   | 0.95(5) | 1.93(5)  | 2.857(5) | 166(4)               |

N(52)-H(52B)...O(11)#4      1.03(6)      1.94(6)      2.913(5)      157(5)

---

Symmetry transformations used to generate equivalent atoms:

#1  $x, y-1, z$  #2  $x+2, y-1, z$  #3  $x-1, y, z$  #4  $x+1, y, z$  #5  $x+1, y-1, z$

**Table S8.** Crystal data and structure refinement for **4 (CSD Code: 1402881)**.

|                                   |                                                                  |                   |
|-----------------------------------|------------------------------------------------------------------|-------------------|
| Identification code               | mo_v14hth3_0m                                                    |                   |
| Empirical formula                 | C <sub>26</sub> H <sub>18</sub> Br N <sub>5</sub> O <sub>8</sub> |                   |
| Formula weight                    | 608.36                                                           |                   |
| Temperature                       | 173(2) K                                                         |                   |
| Wavelength                        | 0.71073 Å                                                        |                   |
| Crystal system                    | Monoclinic                                                       |                   |
| Space group                       | P 21/n                                                           |                   |
| Unit cell dimensions              | a = 8.9809(6) Å                                                  | α = 90°.          |
|                                   | b = 7.3118(5) Å                                                  | β = 94.0950(10)°. |
|                                   | c = 38.083(3) Å                                                  | γ = 90°.          |
| Volume                            | 2494.4(3) Å <sup>3</sup>                                         |                   |
| Z                                 | 4                                                                |                   |
| Density (calculated)              | 1.620 Mg/m <sup>3</sup>                                          |                   |
| Absorption coefficient            | 1.711 mm <sup>-1</sup>                                           |                   |
| F(000)                            | 1232                                                             |                   |
| Crystal size                      | 0.340 x 0.100 x 0.100 mm <sup>3</sup>                            |                   |
| Theta range for data collection   | 2.985 to 25.496°.                                                |                   |
| Index ranges                      | -10 ≤ h ≤ 10, -8 ≤ k ≤ 8, -46 ≤ l ≤ 46                           |                   |
| Reflections collected             | 23111                                                            |                   |
| Independent reflections           | 4616 [R(int) = 0.0288]                                           |                   |
| Completeness to theta = 25.242°   | 99.7 %                                                           |                   |
| Refinement method                 | Full-matrix least-squares on F <sup>2</sup>                      |                   |
| Data / restraints / parameters    | 4616 / 0 / 373                                                   |                   |
| Goodness-of-fit on F <sup>2</sup> | 1.085                                                            |                   |
| Final R indices [I > 2σ(I)]       | R <sub>1</sub> = 0.0358, wR <sub>2</sub> = 0.0823                |                   |
| R indices (all data)              | R <sub>1</sub> = 0.0451, wR <sub>2</sub> = 0.0858                |                   |
| Extinction coefficient            | n/a                                                              |                   |
| Largest diff. peak and hole       | 0.511 and -0.216 e.Å <sup>-3</sup>                               |                   |

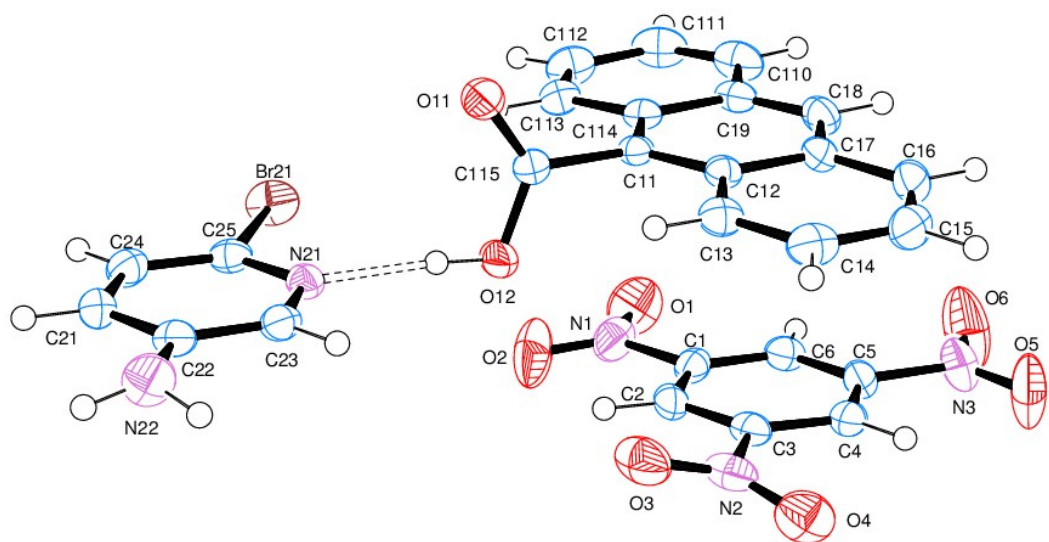

**Figure S5** Asymmetric unit of TNB:9-anthroic acid:6-bromo-3-aminopyridine (**4**) (1:1:1), indicating the numbering scheme, ellipsoids at 50 % probability. Hydrogen bonding interactions shown with a dashed bond.

**Table S9.** Hydrogen bonds for **4** [Å and °].

| D-H...A               | d(D-H)  | d(H...A) | d(D...A) | <(DHA) |
|-----------------------|---------|----------|----------|--------|
| O(12)-H(12)...N(21)   | 0.84(4) | 1.78(4)  | 2.613(3) | 174(3) |
| N(22)-H(22A)...O(2)#1 | 0.85(3) | 2.31(4)  | 3.157(4) | 174(3) |
| N(22)-H(22B)...O(2)#2 | 0.85(3) | 2.44(3)  | 3.267(3) | 165(3) |

Symmetry transformations used to generate equivalent atoms:

#1 -x+1,-y+1,-z+1 #2 x+1,y,z

**Table S10.** Crystal data and structure refinement for **5 (CSD Code: 1402882)**.

|                                   |                                                                  |                  |
|-----------------------------------|------------------------------------------------------------------|------------------|
| Identification code               | v14hth4                                                          |                  |
| Empirical formula                 | C <sub>26</sub> H <sub>18</sub> Br N <sub>5</sub> O <sub>8</sub> |                  |
| Formula weight                    | 608.36                                                           |                  |
| Temperature                       | 173(2) K                                                         |                  |
| Wavelength                        | 0.71073 Å                                                        |                  |
| Crystal system                    | Monoclinic                                                       |                  |
| Space group                       | P 21/c                                                           |                  |
| Unit cell dimensions              | a = 21.301(5) Å                                                  | α = 90°.         |
|                                   | b = 7.2862(13) Å                                                 | β = 113.047(5)°. |
|                                   | c = 17.188(3) Å                                                  | γ = 90°.         |
| Volume                            | 2454.7(8) Å <sup>3</sup>                                         |                  |
| Z                                 | 4                                                                |                  |
| Density (calculated)              | 1.646 Mg/m <sup>3</sup>                                          |                  |
| Absorption coefficient            | 1.738 mm <sup>-1</sup>                                           |                  |
| F(000)                            | 1232                                                             |                  |
| Crystal size                      | 0.280 x 0.130 x 0.040 mm <sup>3</sup>                            |                  |
| Theta range for data collection   | 2.983 to 25.499°.                                                |                  |
| Index ranges                      | -25 ≤ h ≤ 25, -8 ≤ k ≤ 8, -20 ≤ l ≤ 20                           |                  |
| Reflections collected             | 52199                                                            |                  |
| Independent reflections           | 4560 [R(int) = 0.1353]                                           |                  |
| Completeness to theta = 25.242°   | 99.8 %                                                           |                  |
| Refinement method                 | Full-matrix least-squares on F <sup>2</sup>                      |                  |
| Data / restraints / parameters    | 4560 / 0 / 373                                                   |                  |
| Goodness-of-fit on F <sup>2</sup> | 1.025                                                            |                  |
| Final R indices [I > 2σ(I)]       | R <sub>1</sub> = 0.0564, wR <sub>2</sub> = 0.1188                |                  |
| R indices (all data)              | R <sub>1</sub> = 0.1062, wR <sub>2</sub> = 0.1378                |                  |
| Extinction coefficient            | n/a                                                              |                  |
| Largest diff. peak and hole       | 0.858 and -0.734 e.Å <sup>-3</sup>                               |                  |

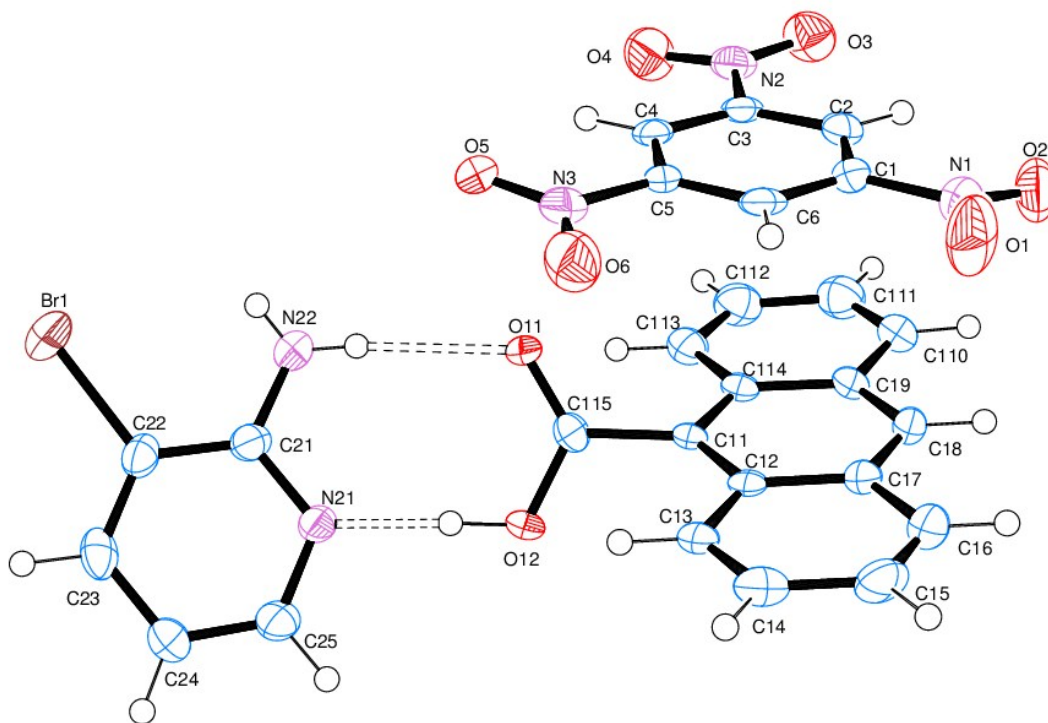

**Figure S6** Asymmetric unit of TNB:9-anthroic acid:3-bromo-2-aminopyridine (**5**) (1:1:1), indicating the numbering scheme, ellipsoids at 50 % probability. Hydrogen bonding interactions shown with a dashed bond.

**Table S11.** Hydrogen bonds for **5** [ $\text{\AA}$  and  $^\circ$ ].

| D-H...A              | d(D-H)  | d(H...A) | d(D...A) | $\angle(\text{DHA})$ |
|----------------------|---------|----------|----------|----------------------|
| O(12)-H(12)...N(21)  | 0.97(7) | 1.67(7)  | 2.628(4) | 171(6)               |
| N(22)-H(22A)...O(11) | 0.81(5) | 2.16(5)  | 2.941(6) | 164(4)               |
| N(22)-H(22B)...Br(1) | 0.75(5) | 2.70(5)  | 3.109(5) | 116(4)               |



**Table S12.** Crystal data and structure refinement for **6 (CSD Code: 1402883)**.

|                                   |                                                                  |                 |
|-----------------------------------|------------------------------------------------------------------|-----------------|
| Identification code               | mo_v14hth12_0m                                                   |                 |
| Empirical formula                 | C <sub>26</sub> H <sub>18</sub> Br N <sub>5</sub> O <sub>8</sub> |                 |
| Formula weight                    | 608.36                                                           |                 |
| Temperature                       | 173(2) K                                                         |                 |
| Wavelength                        | 0.71073 Å                                                        |                 |
| Crystal system                    | Monoclinic                                                       |                 |
| Space group                       | P 21/n                                                           |                 |
| Unit cell dimensions              | a = 8.9784(15) Å                                                 | α = 90°.        |
|                                   | b = 7.2372(12) Å                                                 | β = 94.321(4)°. |
|                                   | c = 38.160(7) Å                                                  | γ = 90°.        |
| Volume                            | 2472.5(7) Å <sup>3</sup>                                         |                 |
| Z                                 | 4                                                                |                 |
| Density (calculated)              | 1.634 Mg/m <sup>3</sup>                                          |                 |
| Absorption coefficient            | 1.726 mm <sup>-1</sup>                                           |                 |
| F(000)                            | 1232                                                             |                 |
| Crystal size                      | 0.366 x 0.210 x 0.124 mm <sup>3</sup>                            |                 |
| Theta range for data collection   | 2.865 to 25.499°.                                                |                 |
| Index ranges                      | -10 ≤ h ≤ 10, -8 ≤ k ≤ 8, -46 ≤ l ≤ 46                           |                 |
| Reflections collected             | 28820                                                            |                 |
| Independent reflections           | 4588 [R(int) = 0.0486]                                           |                 |
| Completeness to theta = 25.242°   | 99.8 %                                                           |                 |
| Refinement method                 | Full-matrix least-squares on F <sup>2</sup>                      |                 |
| Data / restraints / parameters    | 4588 / 0 / 373                                                   |                 |
| Goodness-of-fit on F <sup>2</sup> | 1.058                                                            |                 |
| Final R indices [I > 2σ(I)]       | R1 = 0.0426, wR2 = 0.1146                                        |                 |
| R indices (all data)              | R1 = 0.0476, wR2 = 0.1189                                        |                 |
| Extinction coefficient            | n/a                                                              |                 |
| Largest diff. peak and hole       | 1.107 and -0.704 e.Å <sup>-3</sup>                               |                 |

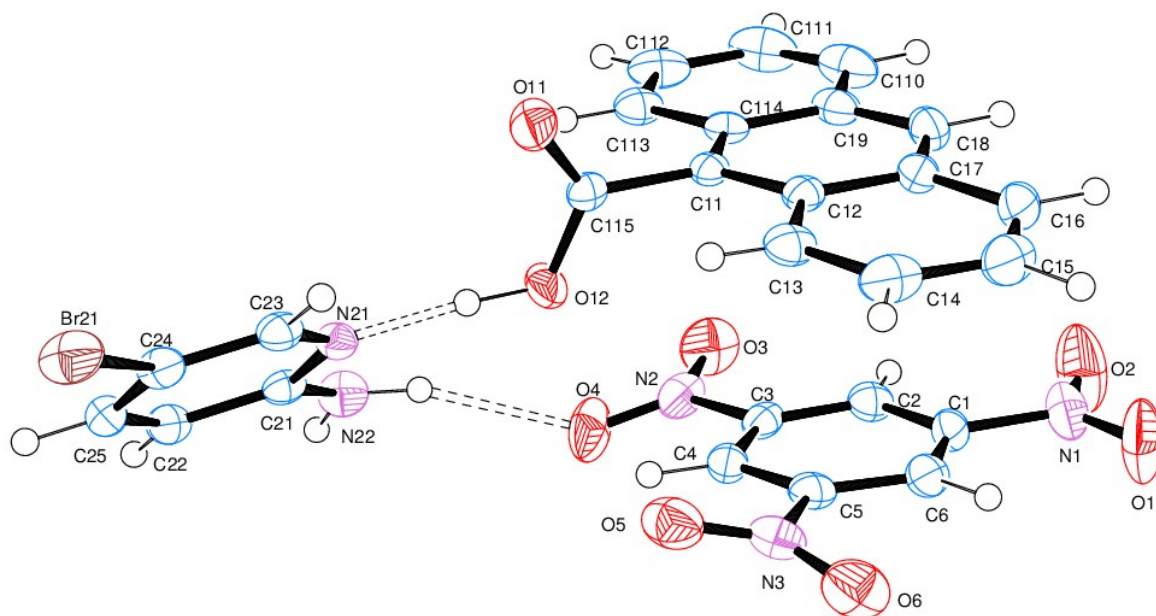

**Figure S7** Asymmetric unit of TNB:9-anthroic acid:5-bromo-2-aminopyridine (**6**) (1:1:1), indicating the numbering scheme, ellipsoids at 50 % probability. Hydrogen bonding interactions shown with a dashed bond.

**Table S13.** Hydrogen bonds for **6** [Å and °].

| D-H...A               | d(D-H)  | d(H...A) | d(D...A) | <(DHA) |
|-----------------------|---------|----------|----------|--------|
| O(12)-H(12)...N(21)   | 0.98(3) | 1.57(3)  | 2.542(3) | 171(3) |
| N(22)-H(22A)...O(4)#1 | 0.88(4) | 2.27(4)  | 3.109(3) | 161(3) |
| N(22)-H(22B)...O(4)   | 0.92(4) | 2.31(4)  | 3.173(3) | 154(3) |

Symmetry transformations used to generate equivalent atoms:

#1 -x+2,-y+1,-z

**Table S14.** Crystal data and structure refinement for **7 (CSD Code: 1402884)**.

|                                   |                                                                  |                 |
|-----------------------------------|------------------------------------------------------------------|-----------------|
| Identification code               | mo_v14hth5_0m                                                    |                 |
| Empirical formula                 | C <sub>26</sub> H <sub>18</sub> Cl N <sub>5</sub> O <sub>8</sub> |                 |
| Formula weight                    | 563.90                                                           |                 |
| Temperature                       | 173(2) K                                                         |                 |
| Wavelength                        | 0.71073 Å                                                        |                 |
| Crystal system                    | Monoclinic                                                       |                 |
| Space group                       | P 21/n                                                           |                 |
| Unit cell dimensions              | a = 8.9310(10) Å                                                 | α = 90°.        |
|                                   | b = 7.2239(8) Å                                                  | β = 94.402(2)°. |
|                                   | c = 38.218(5) Å                                                  | γ = 90°.        |
| Volume                            | 2458.4(5) Å <sup>3</sup>                                         |                 |
| Z                                 | 4                                                                |                 |
| Density (calculated)              | 1.524 Mg/m <sup>3</sup>                                          |                 |
| Absorption coefficient            | 0.219 mm <sup>-1</sup>                                           |                 |
| F(000)                            | 1160                                                             |                 |
| Crystal size                      | 0.09 x 0.09 x 0.34 mm <sup>3</sup>                               |                 |
| Theta range for data collection   | 2.870 to 25.500°.                                                |                 |
| Index ranges                      | -10 ≤ h ≤ 10, -8 ≤ k ≤ 8, -46 ≤ l ≤ 46                           |                 |
| Reflections collected             | 27353                                                            |                 |
| Independent reflections           | 4573 [R(int) = 0.0290]                                           |                 |
| Completeness to theta = 25.242°   | 99.8 %                                                           |                 |
| Refinement method                 | Full-matrix least-squares on F <sup>2</sup>                      |                 |
| Data / restraints / parameters    | 4573 / 0 / 370                                                   |                 |
| Goodness-of-fit on F <sup>2</sup> | 1.026                                                            |                 |
| Final R indices [I > 2σ(I)]       | R1 = 0.0371, wR2 = 0.0902                                        |                 |
| R indices (all data)              | R1 = 0.0522, wR2 = 0.0981                                        |                 |
| Extinction coefficient            | n/a                                                              |                 |
| Largest diff. peak and hole       | 0.288 and -0.235 e.Å <sup>-3</sup>                               |                 |

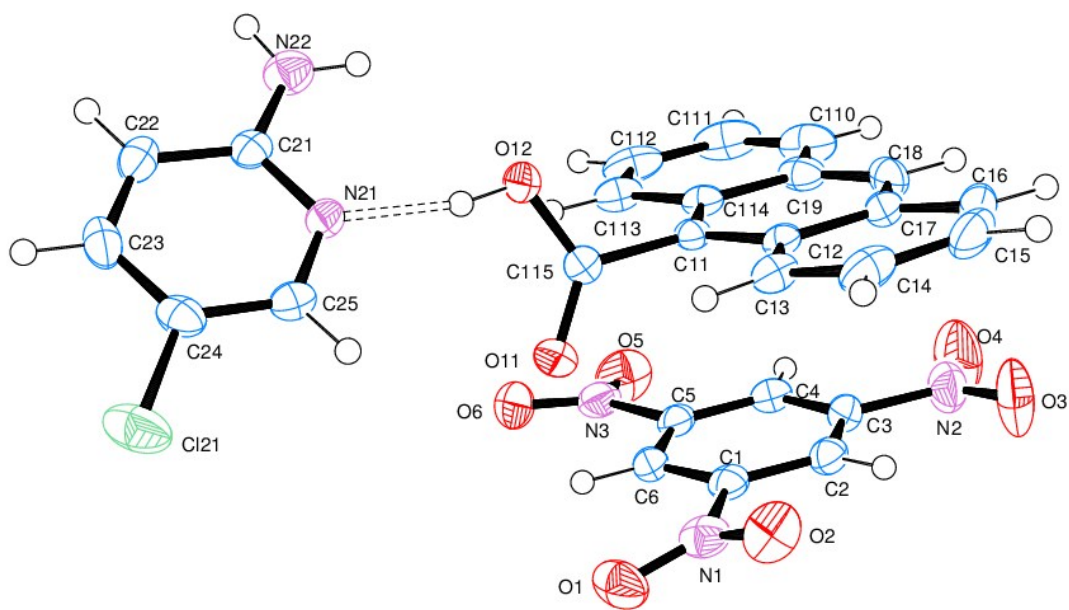

**Figure S8** Asymmetric unit of TNB:9-anthroic acid:5-chloro-2-aminopyridine (**7**) (1:1:1), indicating the numbering scheme, ellipsoids at 50 % probability. Hydrogen bonding interactions shown with a dashed bond.

**Table S15.** Hydrogen bonds for **7** [Å and °].

| D-H...A               | d(D-H)  | d(H...A) | d(D...A)   | <(DHA) |
|-----------------------|---------|----------|------------|--------|
| O(12)-H(12)...N(21)   | 0.84    | 1.71     | 2.5395(17) | 167    |
| N(22)-H(22A)...O(6)#1 | 0.88(2) | 2.42(2)  | 3.192(2)   | 147(2) |
| N(22)-H(22B)...O(6)#2 | 0.83(2) | 2.31(2)  | 3.116(2)   | 162(2) |

Symmetry transformations used to generate equivalent atoms:

#1  $x, y+1, z$  #2  $-x+1, -y+1, -z$

**Table S16.** Crystal data and structure refinement for **8 (CSD Code: 1402885).**

|                                   |                                                                |                  |
|-----------------------------------|----------------------------------------------------------------|------------------|
| Identification code               | v14hth9_p.                                                     |                  |
| Empirical formula                 | C <sub>26</sub> H <sub>18</sub> N <sub>6</sub> O <sub>10</sub> |                  |
| Formula weight                    | 574.46                                                         |                  |
| Temperature                       | 173(2) K                                                       |                  |
| Wavelength                        | 0.71073 Å                                                      |                  |
| Crystal system                    | Monoclinic                                                     |                  |
| Space group                       | P 21/c                                                         |                  |
| Unit cell dimensions              | a = 21.0640(17) Å                                              | α = 90°.         |
|                                   | b = 7.3594(5) Å                                                | β = 112.320(2)°. |
|                                   | c = 17.0447(13) Å                                              | γ = 90°.         |
| Volume                            | 2444.3(3) Å <sup>3</sup>                                       |                  |
| Z                                 | 4                                                              |                  |
| Density (calculated)              | 1.561 Mg/m <sup>3</sup>                                        |                  |
| Absorption coefficient            | 0.123 mm <sup>-1</sup>                                         |                  |
| F(000)                            | 1184                                                           |                  |
| Crystal size                      | 0.530 x 0.060 x 0.050 mm <sup>3</sup>                          |                  |
| Theta range for data collection   | 3.384 to 25.498°.                                              |                  |
| Index ranges                      | -25 ≤ h ≤ 25, -8 ≤ k ≤ 8, -20 ≤ l ≤ 20                         |                  |
| Reflections collected             | 49213                                                          |                  |
| Independent reflections           | 4543 [R(int) = 0.0635]                                         |                  |
| Completeness to theta = 25.242°   | 99.7 %                                                         |                  |
| Refinement method                 | Full-matrix least-squares on F <sup>2</sup>                    |                  |
| Data / restraints / parameters    | 4543 / 0 / 388                                                 |                  |
| Goodness-of-fit on F <sup>2</sup> | 1.017                                                          |                  |
| Final R indices [I > 2σ(I)]       | R1 = 0.0391, wR2 = 0.0861                                      |                  |
| R indices (all data)              | R1 = 0.0633, wR2 = 0.0984                                      |                  |
| Extinction coefficient            | n/a                                                            |                  |
| Largest diff. peak and hole       | 0.203 and -0.191 e.Å <sup>-3</sup>                             |                  |

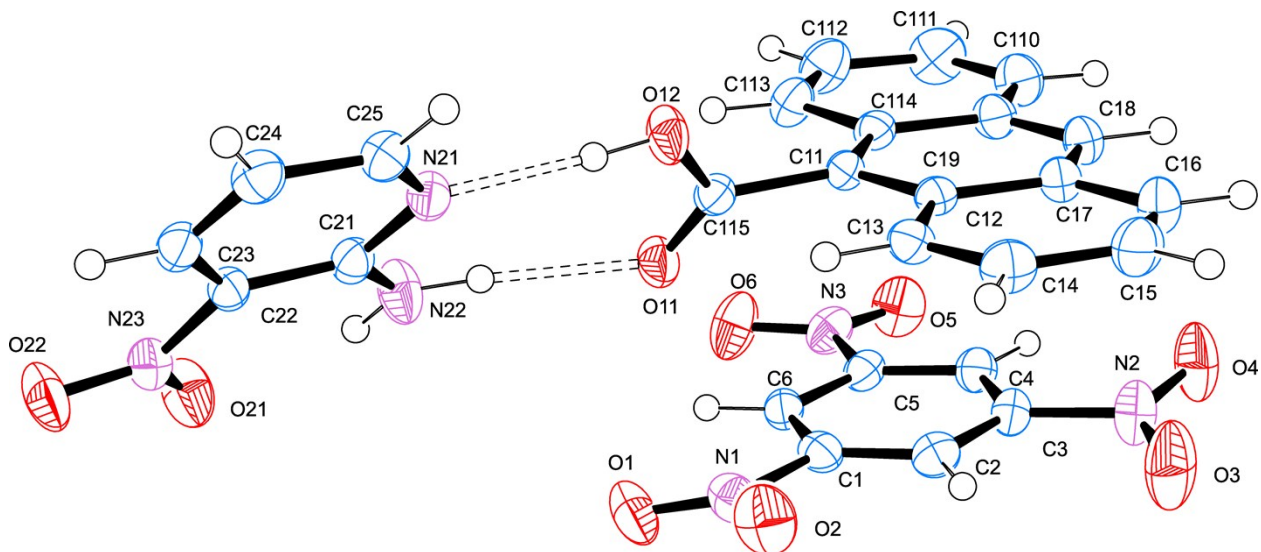

**Figure S9** Asymmetric unit of TNB:9-anthroic acid:3-nitro-2-aminopyridine (**8**) (1:1:1), indicating the numbering scheme, ellipsoids at 50 % probability. Hydrogen bonding interactions shown with a dashed bond.

**Table S17.** Hydrogen bonds for **8** [ $\text{\AA}$  and  $^\circ$ ].

| D-H...A              | d(D-H)  | d(H...A) | d(D...A)   | $\angle$ (DHA) |
|----------------------|---------|----------|------------|----------------|
| O(12)-H(12)...N(21)  | 0.84    | 1.86     | 2.6929(19) | 171            |
| N(22)-H(22A)...O(11) | 0.91(2) | 2.01(3)  | 2.918(2)   | 172(2)         |
| N(22)-H(22B)...O(21) | 0.87(2) | 2.01(2)  | 2.636(2)   | 128(2)         |

**Table S18.** Crystal data and structure refinement for **9 (CSD Code: 1402886)**.

|                                   |                                                                |                 |
|-----------------------------------|----------------------------------------------------------------|-----------------|
| Identification code               | shelx                                                          |                 |
| Empirical formula                 | C <sub>26</sub> H <sub>18</sub> N <sub>6</sub> O <sub>10</sub> |                 |
| Formula weight                    | 574.46                                                         |                 |
| Temperature                       | 173(2) K                                                       |                 |
| Wavelength                        | 0.71073 Å                                                      |                 |
| Crystal system                    | Monoclinic                                                     |                 |
| Space group                       | P 21/c                                                         |                 |
| Unit cell dimensions              | a = 8.8909(11) Å                                               | α = 90°.        |
|                                   | b = 7.8185(10) Å                                               | β = 96.018(4)°. |
|                                   | c = 36.688(5) Å                                                | γ = 90°.        |
| Volume                            | 2536.2(5) Å <sup>3</sup>                                       |                 |
| Z                                 | 4                                                              |                 |
| Density (calculated)              | 1.504 Mg/m <sup>3</sup>                                        |                 |
| Absorption coefficient            | 0.119 mm <sup>-1</sup>                                         |                 |
| F(000)                            | 1184                                                           |                 |
| Crystal size                      | 0.970 x 0.290 x 0.150 mm <sup>3</sup>                          |                 |
| Theta range for data collection   | 2.834 to 25.497°.                                              |                 |
| Index ranges                      | -10 ≤ h ≤ 10, -9 ≤ k ≤ 9, -44 ≤ l ≤ 44                         |                 |
| Reflections collected             | 44818                                                          |                 |
| Independent reflections           | 4716 [R(int) = 0.0297]                                         |                 |
| Completeness to theta = 25.242°   | 99.5 %                                                         |                 |
| Refinement method                 | Full-matrix least-squares on F <sup>2</sup>                    |                 |
| Data / restraints / parameters    | 4716 / 0 / 388                                                 |                 |
| Goodness-of-fit on F <sup>2</sup> | 1.036                                                          |                 |
| Final R indices [I > 2σ(I)]       | R1 = 0.0748, wR2 = 0.1902                                      |                 |
| R indices (all data)              | R1 = 0.0810, wR2 = 0.1959                                      |                 |
| Extinction coefficient            | n/a                                                            |                 |
| Largest diff. peak and hole       | 0.964 and -0.864 e.Å <sup>-3</sup>                             |                 |

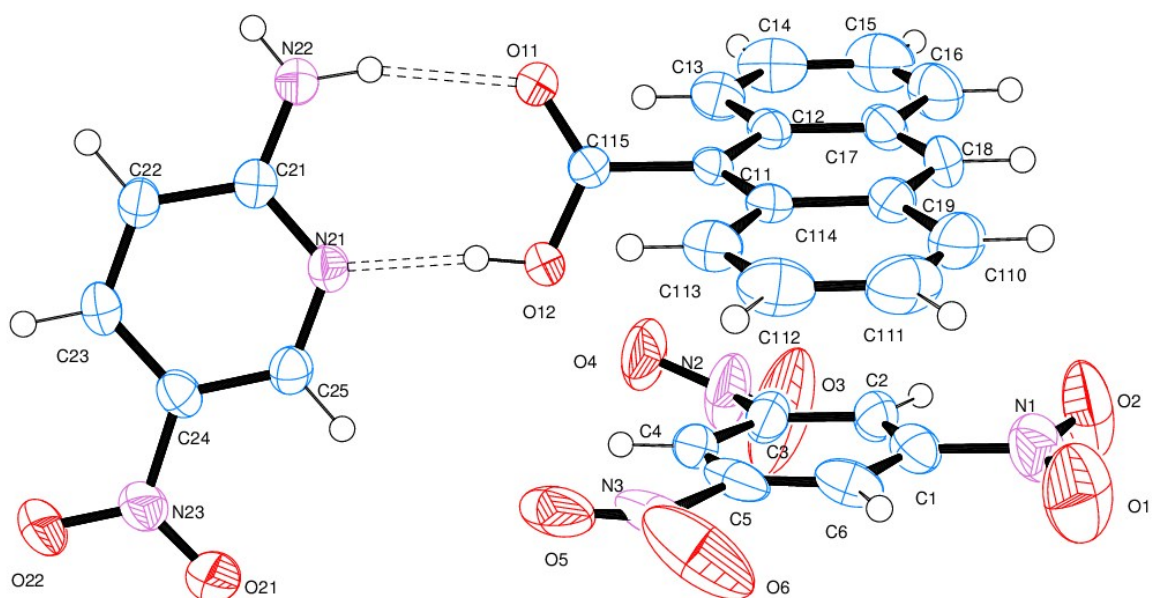

**Figure S10** Asymmetric unit of TNB:9-anthroic acid:5-nitro-2-aminopyridine (**9**) (1:1:1), indicating the numbering scheme, ellipsoids at 50 % probability. Hydrogen bonding interactions shown with a dashed bond. Disorder shown for the oxygen atoms of the nitro group.

**Table S19.** Hydrogen bonds for **9** [ $\text{\AA}$  and  $^\circ$ ].

| D-H...A                | d(D-H)  | d(H...A) | d(D...A) | $\angle(\text{DHA})$ |
|------------------------|---------|----------|----------|----------------------|
| O(12)-H(12)...N(21)    | 0.84    | 1.80     | 2.633(3) | 170.9                |
| N(22)-H(22B)...O(11)   | 0.90(3) | 2.04(3)  | 2.914(3) | 165(3)               |
| N(22)-H(22A)...O(21)#1 | 0.84(4) | 2.40(4)  | 3.143(4) | 149(3)               |

Symmetry transformations used to generate equivalent atoms:

#1 x,y-1,z



**Table S20** Crystal data and structure refinement for **10 (CSD Code: 1402887)**.

|                                   |                                             |                               |
|-----------------------------------|---------------------------------------------|-------------------------------|
| Identification code               | mo_v14hth14_0m.                             |                               |
| Empirical formula                 | C31 H21 N5 O8                               |                               |
| Formula weight                    | 591.53                                      |                               |
| Temperature                       | 173(2) K                                    |                               |
| Wavelength                        | 0.71073 Å                                   |                               |
| Crystal system                    | Triclinic                                   |                               |
| Space group                       | P -1                                        |                               |
| Unit cell dimensions              | a = 7.037(3) Å                              | $\alpha = 87.593(11)^\circ$ . |
|                                   | b = 9.676(4) Å                              | $\beta = 82.035(11)^\circ$ .  |
|                                   | c = 19.738(8) Å                             | $\gamma = 84.659(13)^\circ$ . |
| Volume                            | 1324.5(9) Å <sup>3</sup>                    |                               |
| Z                                 | 2                                           |                               |
| Density (calculated)              | 1.483 Mg/m <sup>3</sup>                     |                               |
| Absorption coefficient            | 0.110 mm <sup>-1</sup>                      |                               |
| F(000)                            | 612                                         |                               |
| Crystal size                      | 1.230 x 0.130 x 0.060 mm <sup>3</sup>       |                               |
| Theta range for data collection   | 2.978 to 25.500°.                           |                               |
| Index ranges                      | -8 ≤ h ≤ 8, -10 ≤ k ≤ 11, -23 ≤ l ≤ 23      |                               |
| Reflections collected             | 14591                                       |                               |
| Independent reflections           | 4502 [R(int) = 0.0771]                      |                               |
| Completeness to theta = 25.242°   | 91.1 %                                      |                               |
| Refinement method                 | Full-matrix least-squares on F <sup>2</sup> |                               |
| Data / restraints / parameters    | 4502 / 0 / 398                              |                               |
| Goodness-of-fit on F <sup>2</sup> | 1.056                                       |                               |
| Final R indices [I > 2σ(I)]       | R1 = 0.1019, wR2 = 0.2847                   |                               |
| R indices (all data)              | R1 = 0.1522, wR2 = 0.3186                   |                               |
| Extinction coefficient            | n/a                                         |                               |
| Largest diff. peak and hole       | 0.355 and -0.502 e.Å <sup>-3</sup>          |                               |

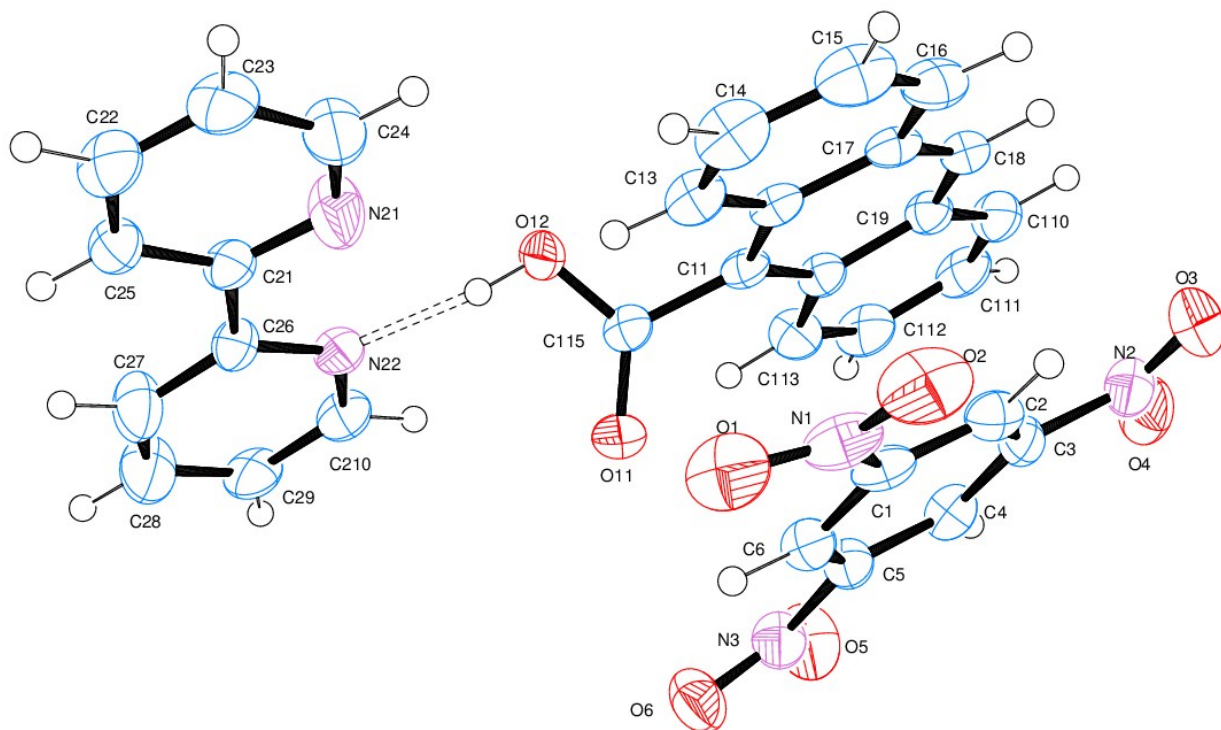

**Figure S11** Asymmetric unit of TNB:9-anthroic acid:2,2'-bipyridine (**11**) (1:1:1), indicating the numbering scheme, ellipsoids at 50 % probability. Hydrogen bonding interactions shown with a dashed bond.

**Table S21.** Hydrogen bonds for **10** [Å and °].

| D-H...A             | d(D-H) | d(H...A) | d(D...A) | <(DHA) |
|---------------------|--------|----------|----------|--------|
| O(12)-H(12)...N(22) | 0.84   | 1.74     | 2.568(5) | 167    |

Symmetry transformations used to generate equivalent atoms:

**Table S22 of carboxylic/carboxylate bond distances and their ratio's.**

| <b>Compound</b>                 | <b>C115-O11 / C415-O42</b> | <b>C115-O12 / C415-O41</b> | <b>Ratio (long over short)</b> |
|---------------------------------|----------------------------|----------------------------|--------------------------------|
| <b>1</b> molecular salt         | 1.256(6)                   | 1.244(6)                   | <b>1.010</b>                   |
| <b>2</b> molecular salt         | 1.307(2) / 1.252(2)        | 1.200(3) / 1.255(2)        | <b>1.089 / 1.002</b>           |
| <b>3</b> molecular salt hydrate | 1.253(5) / 1.252(5)        | 1.250(5) / 1.253(5)        | <b>1.002 / 1.001</b>           |
| <b>4</b> co-crystal             | 1.205(3)                   | 1.301(3)                   | <b>1.080</b>                   |
| <b>5</b> co-crystal             | 1.211(5)                   | 1.312(5)                   | <b>1.083</b>                   |
| <b>6</b> co-crystal             | 1.204(5)                   | 1.298(3)                   | <b>1.078</b>                   |
| <b>7</b> co-crystal             | 1.2106(19)                 | 1.2980(19)                 | <b>1.072</b>                   |
| <b>8</b> co-crystal             | 1.210(2)                   | 1.308(3)                   | <b>1.081</b>                   |
| <b>9</b> co-crystal             | 1.211(3)                   | 1.298(3)                   | <b>1.072</b>                   |
| <b>10</b> co-crystal            | 1.232(7)                   | 1.283(7)                   | <b>1.041</b>                   |

## Powder X-ray diffraction patterns for complexes 1 - 10 (13)

Powder X-ray diffraction data patterns were collected at 293 K on a Bruker D2 Phaser diffractometer which employed a sealed tube Co X-ray source ( $\lambda = 1.78897 \text{ \AA}$ ), operating at 30 kV and 10 mA, and LynxEye PSD detector in Bragg-Brentano geometry. The calculated powder diffraction patterns were computed from the single crystal data which was collected at 173 K using Mercury<sup>11</sup> version 3.5.1. The peak positions are shifted resulting from the different temperatures at which the samples were measured. The peak intensities vary due to preferred orientation.

1. Mercury: visualization and analysis of crystal structures C.F. Macrae, P.R. Edgington, P McCabe, E. Pidcock, G.P. Shields, R. Taylor, M. Towler, J. van de Streek, *J. Appl. Cryst.* (2006), 39-3, 453-457.

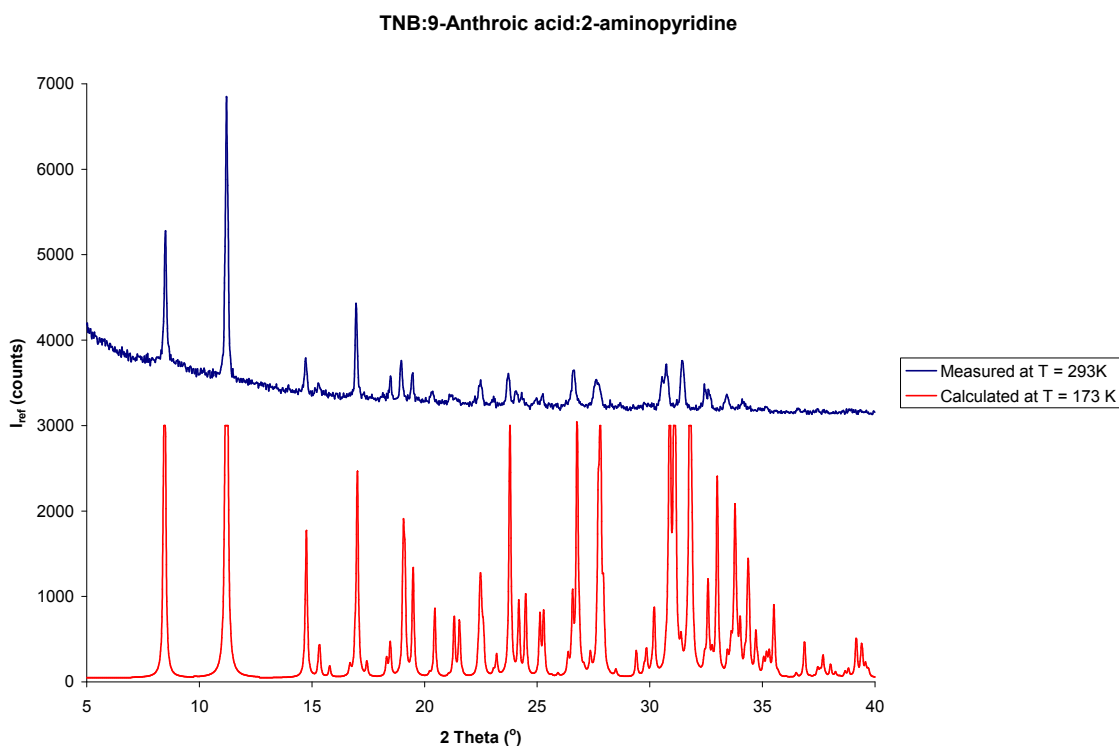

**Figure S13** Measured vs. calculated PXRD of TNB:9-Anthroic acid:2-aminopyridine (1)

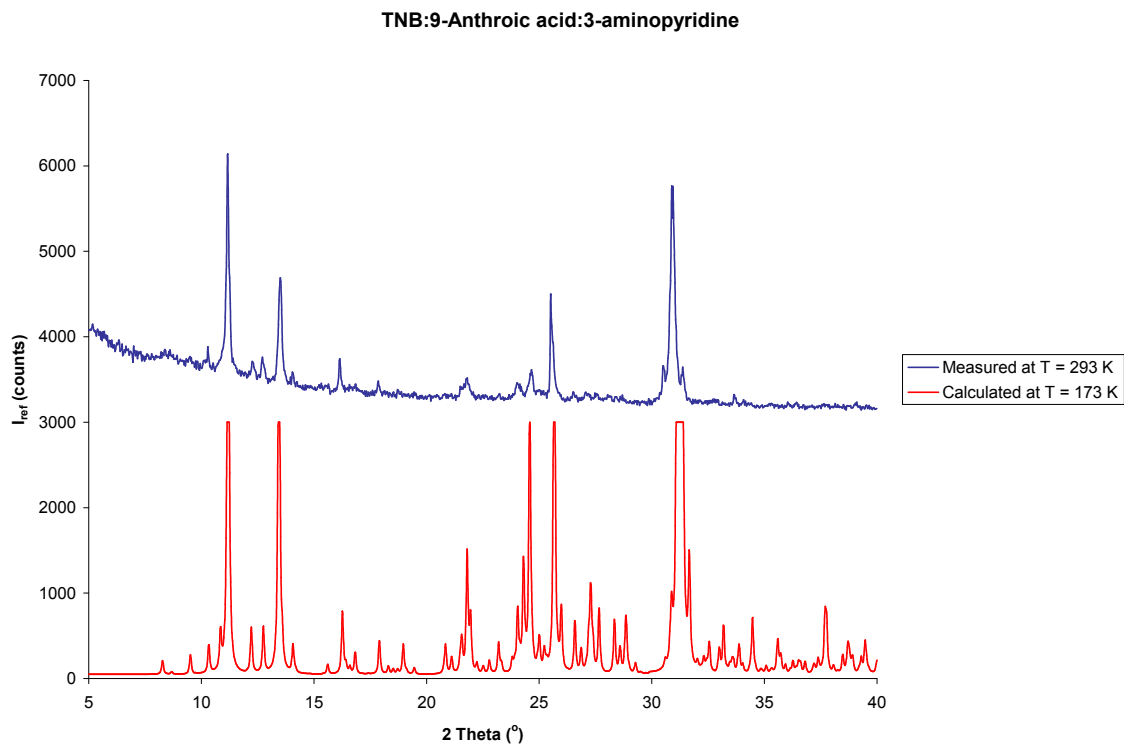

**Figure S14** Measured vs. calculated PXRD of TNB:9-Anthroic acid:3-aminopyridine (2)

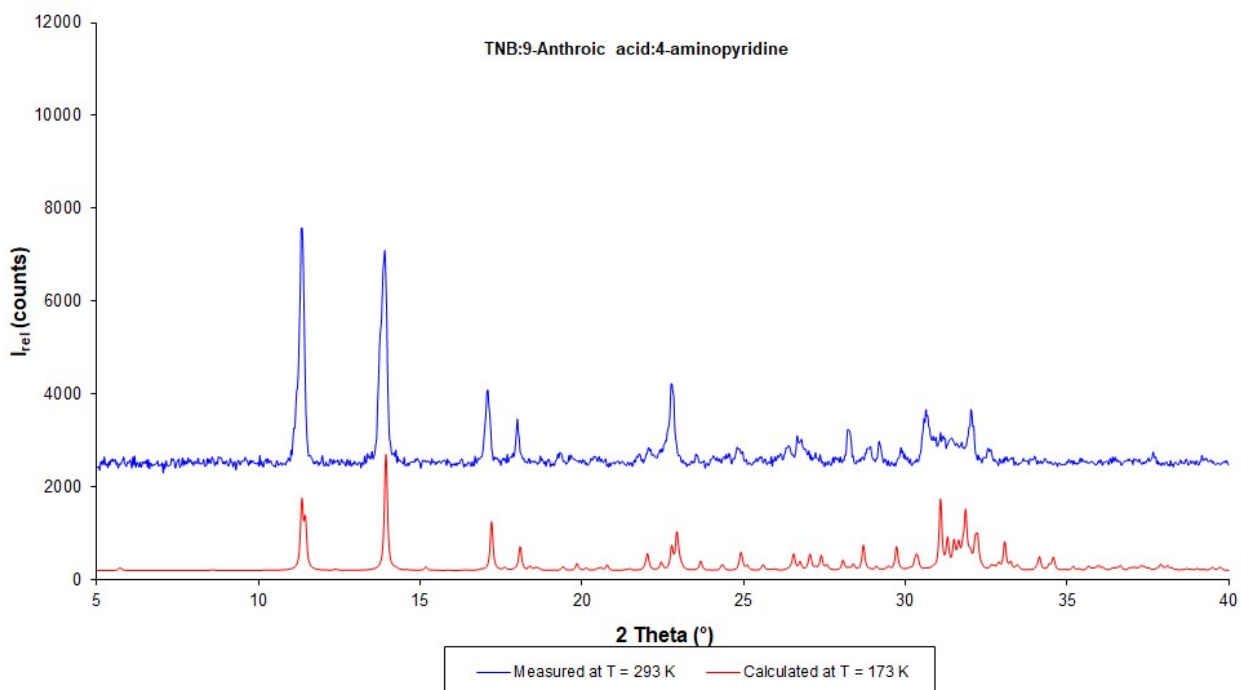

**Figure S15** Measured vs. calculated PXRD of TNB:9-Anthroic acid:4-aminopyridine (3)

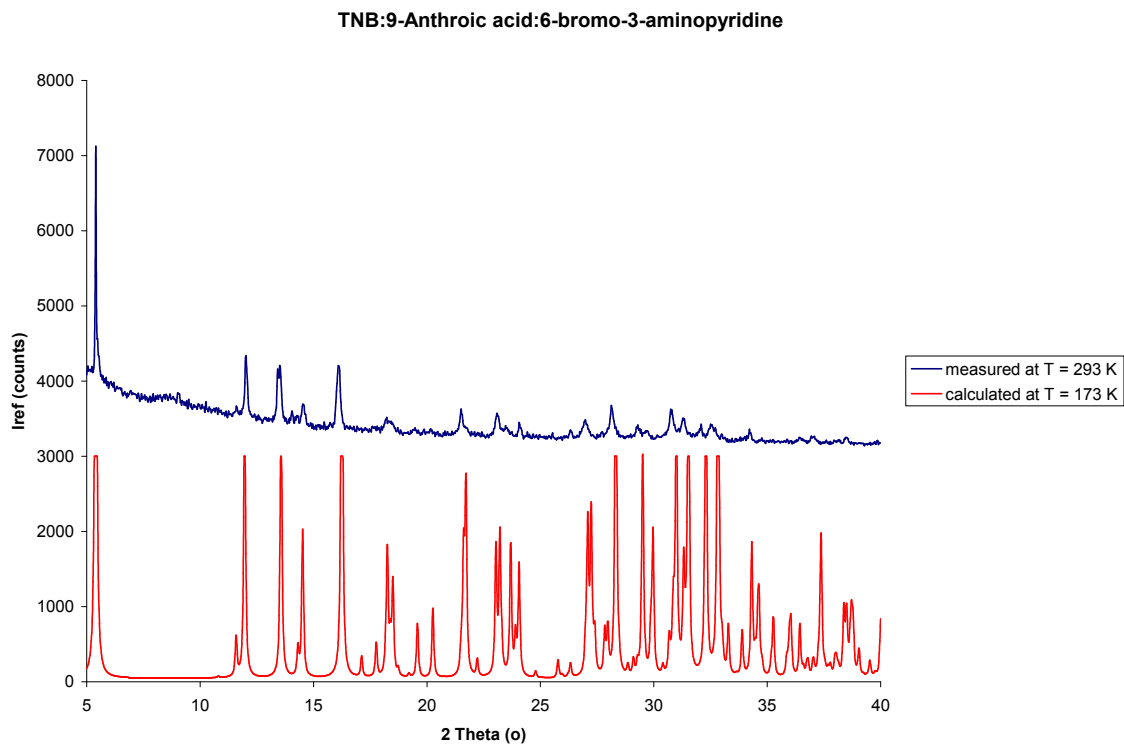

**Figure S16** Measured vs. calculated PXRD of TNB:9-Anthroic acid:6-bromo-3-aminopyridine (4)

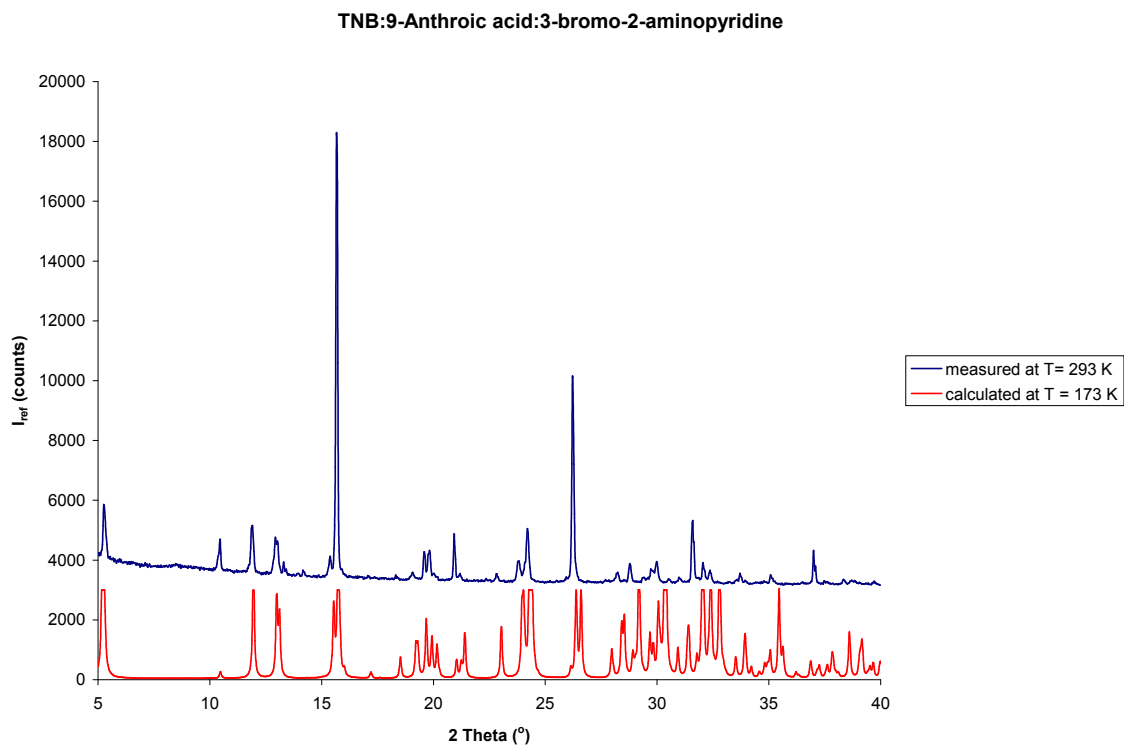

**Figure S17** Measured vs. calculated PXRD of TNB:9-Anthroic acid:3-bromo-2-aminopyridine (5)

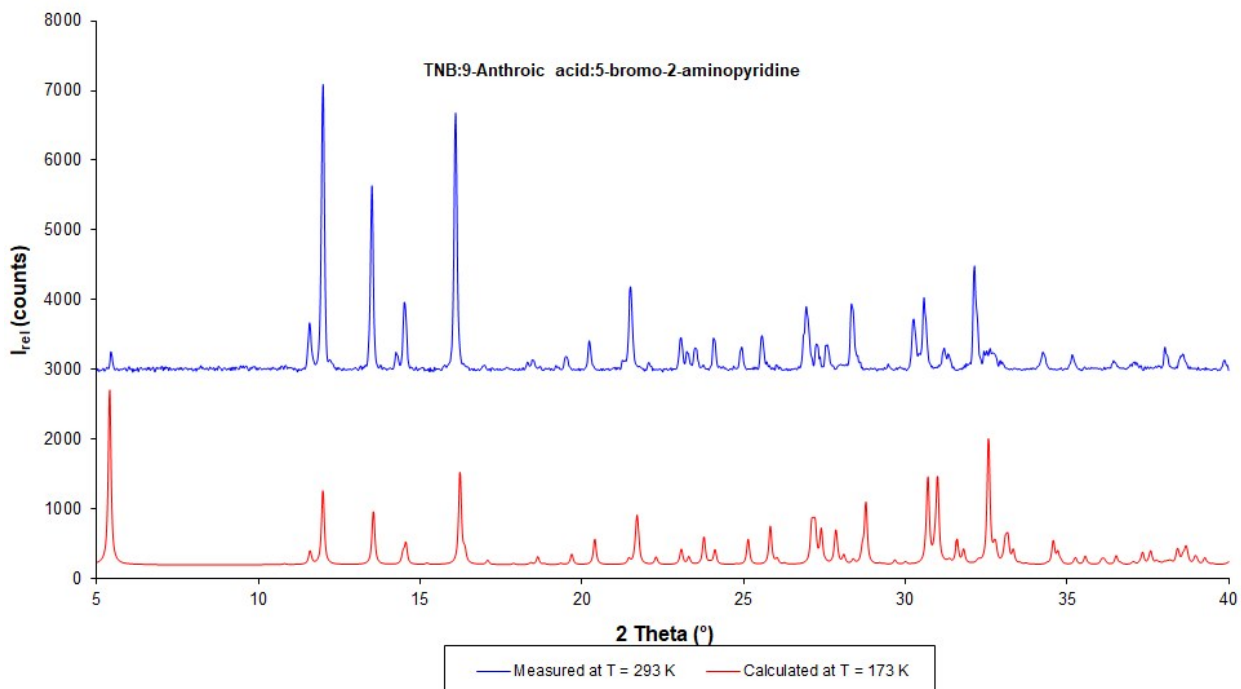

**Figure S18** Measured vs. calculated PXRD of TNB:9-Anthroic acid:5-bromo-2-aminopyridine (6)

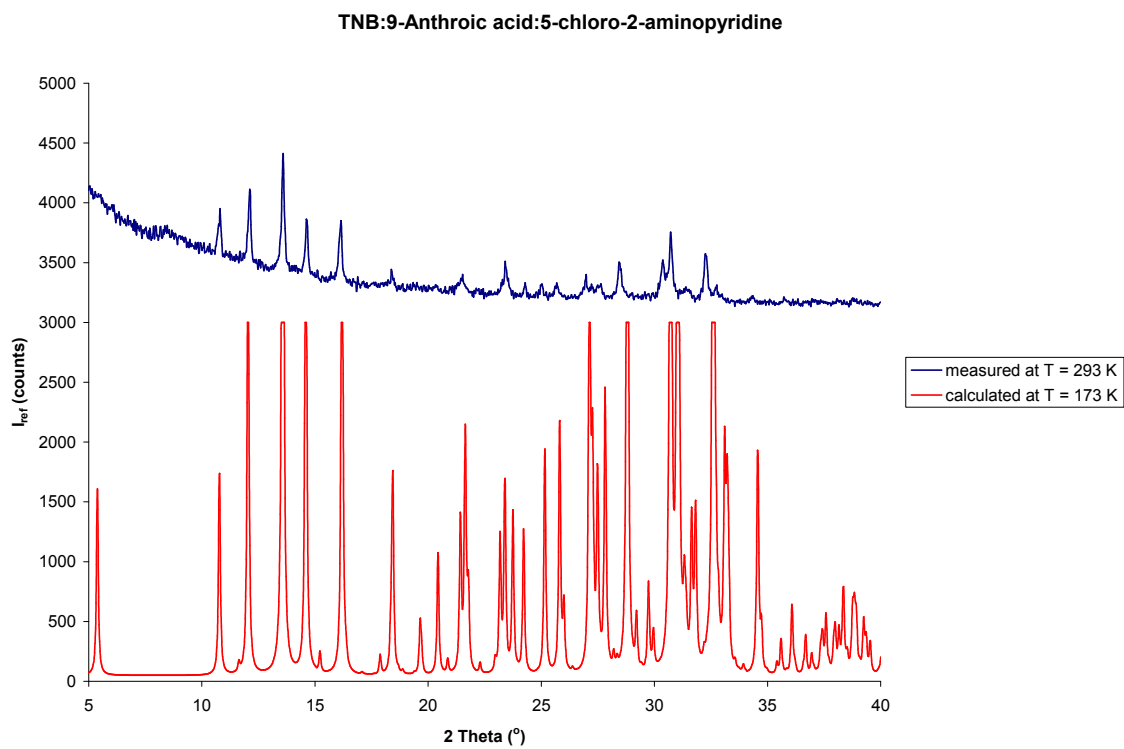

**Figure S19** Measured vs. calculated PXRD of TNB:9-Anthroic acid:5-chloro-2-aminopyridine (7)

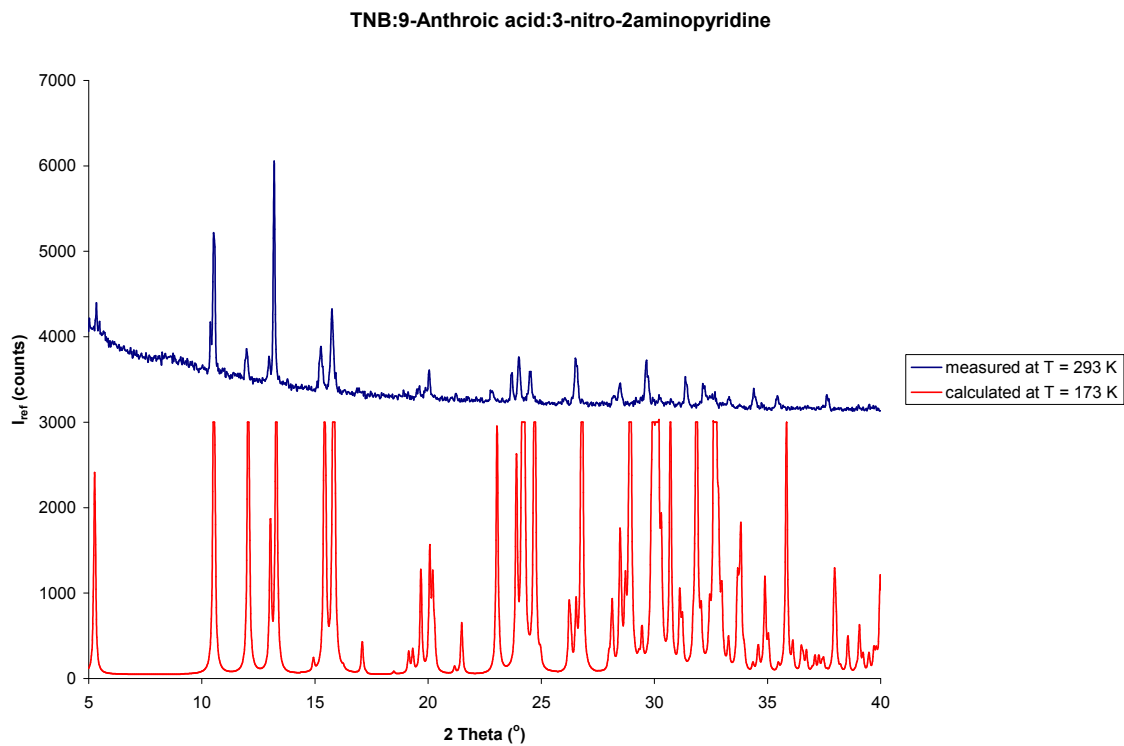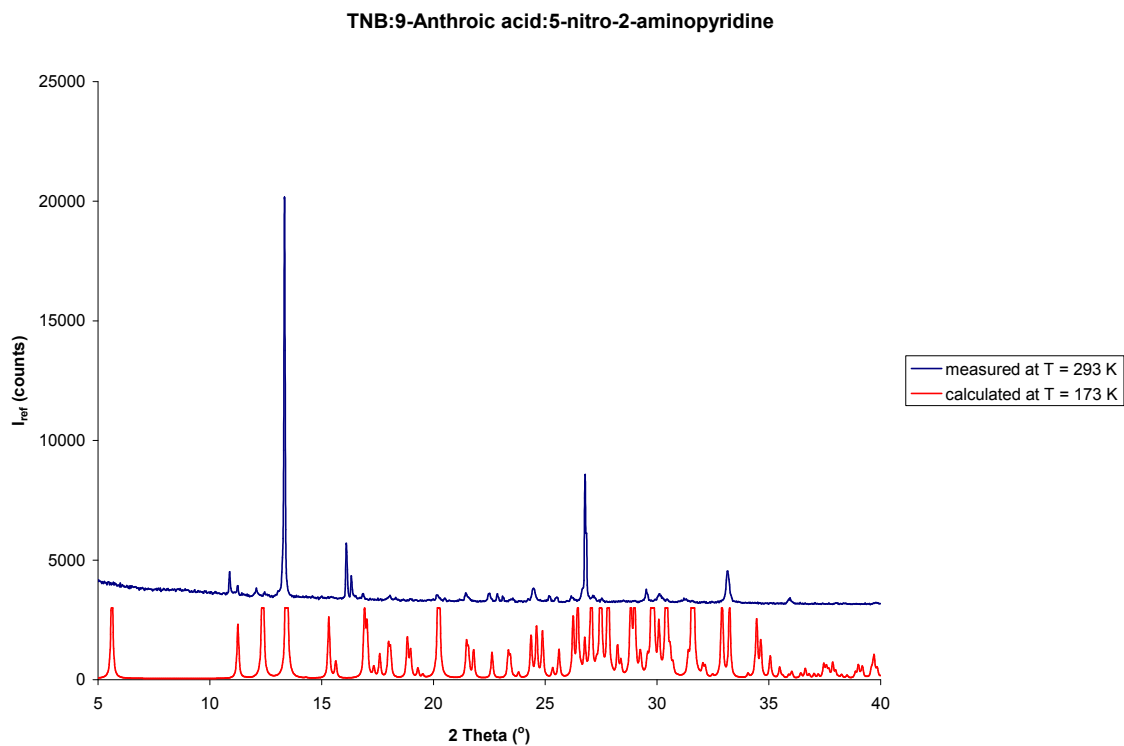



TNB:9-Anthroic acid:2,2'-bipyridine

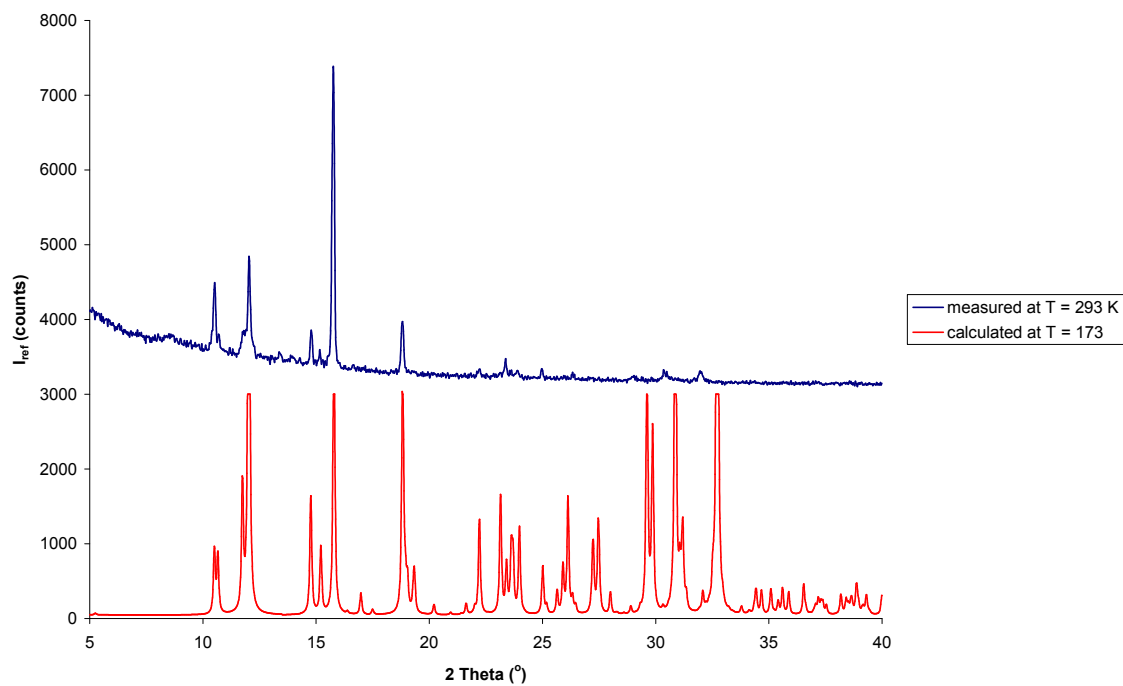

Figure S22 Measured vs. calculated PXRD of TNB:9-Anthroic acid:2,2'-bipyridine (10)

## Infra-red spectroscopic data for complexes 1 - 10

All infra-red spectra were recorded on a Bruker Vertex 70 FT-IR spectrometer equipped with a Harrick MVP-Pro ATR. The spectral resolution was set to 4 cm<sup>-1</sup> and the spectra were recorded between 400 - 4000 cm<sup>-1</sup>.

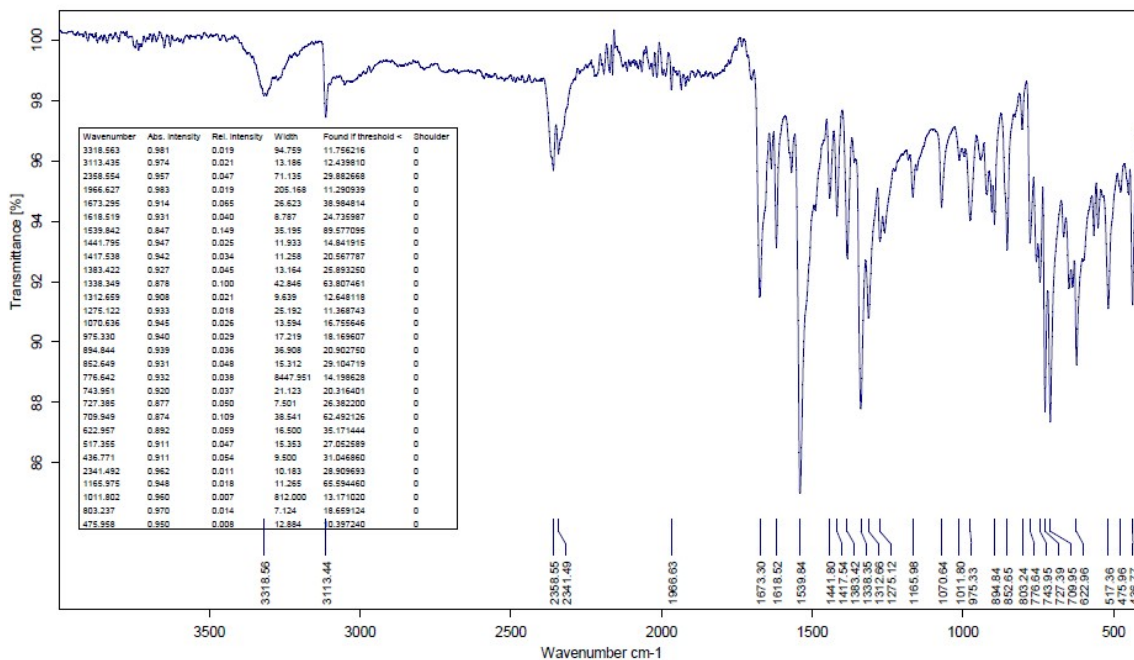

Figure S23 IR spectra of TNB:9-Anthroic acid:2-aminopyridine (1)

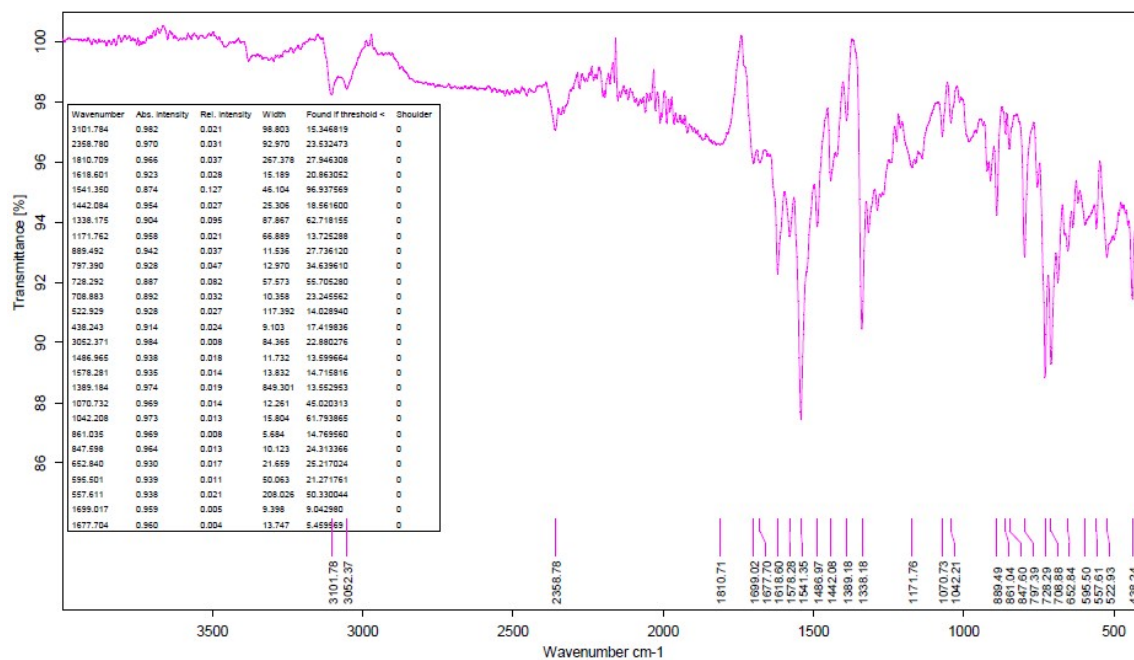

Figure S24 IR spectra of TNB:9-Anthroic acid:3-aminopyridine (2)

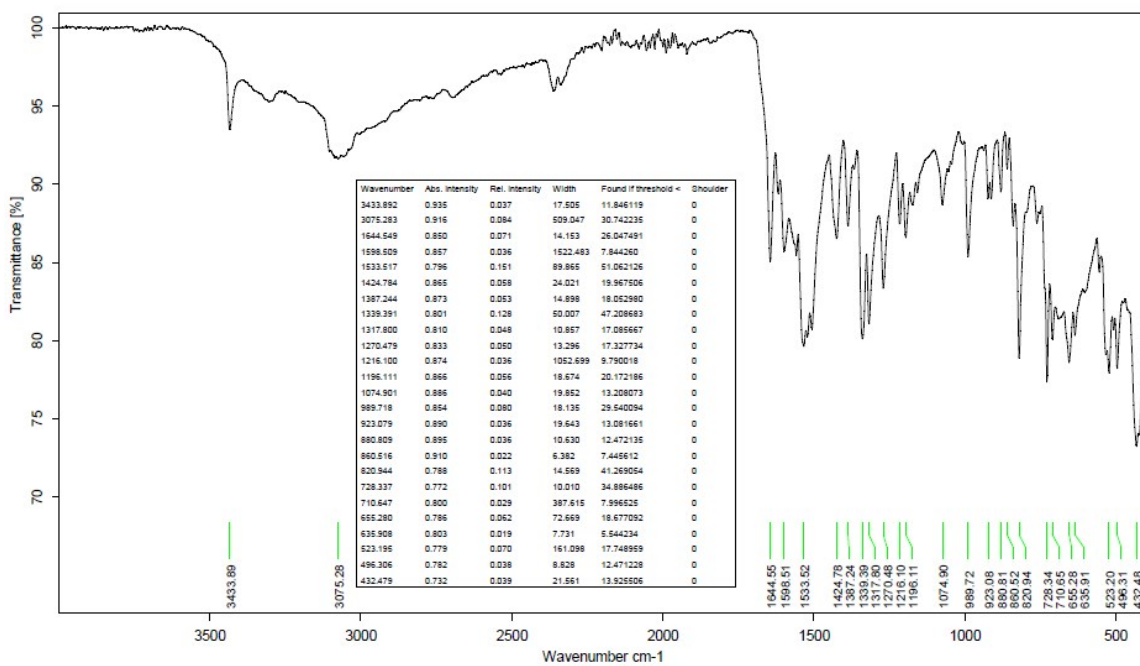

Figure S25 IR spectra of TNB:9-Anthroic acid:4-aminopyridine (3)

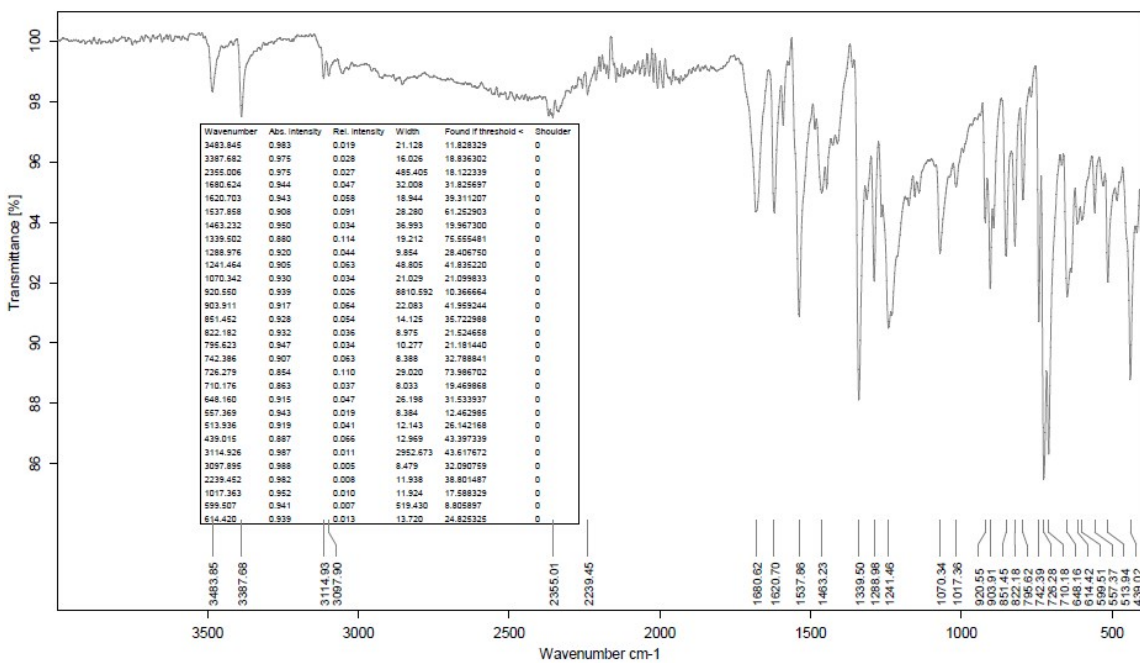

Figure S26 IR spectra of TNB:9-Anthroic acid:6-bromo-3-aminopyridine (4)

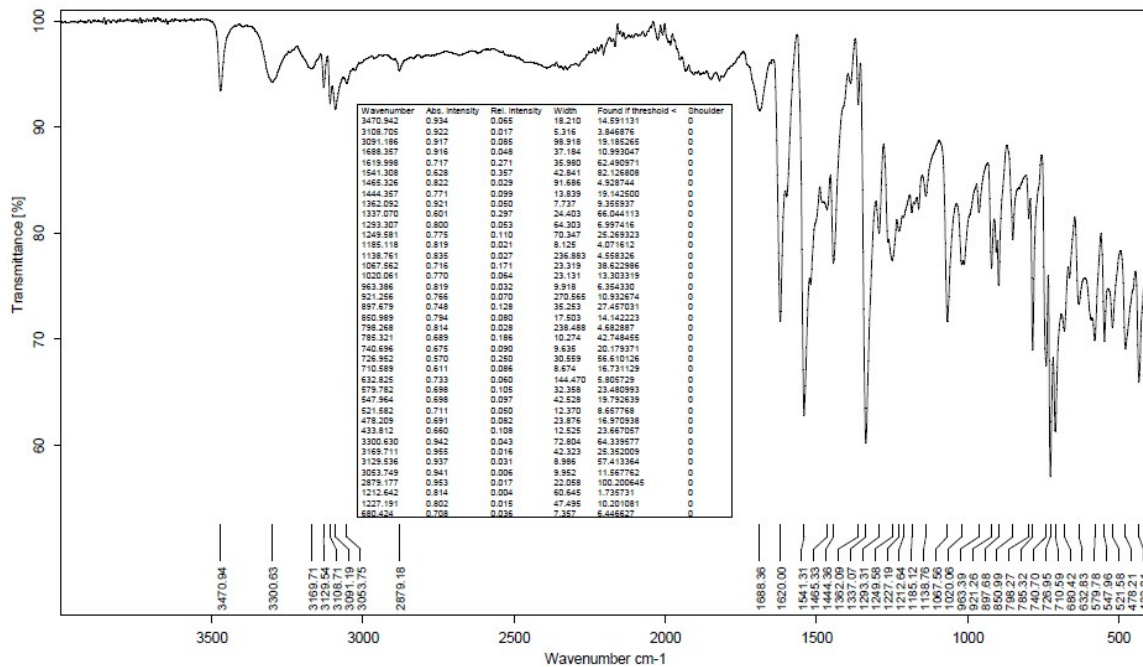

Figure S27 IR spectra of TNB:9-Anthroic acid:3-bromo-2-aminopyridine (5)

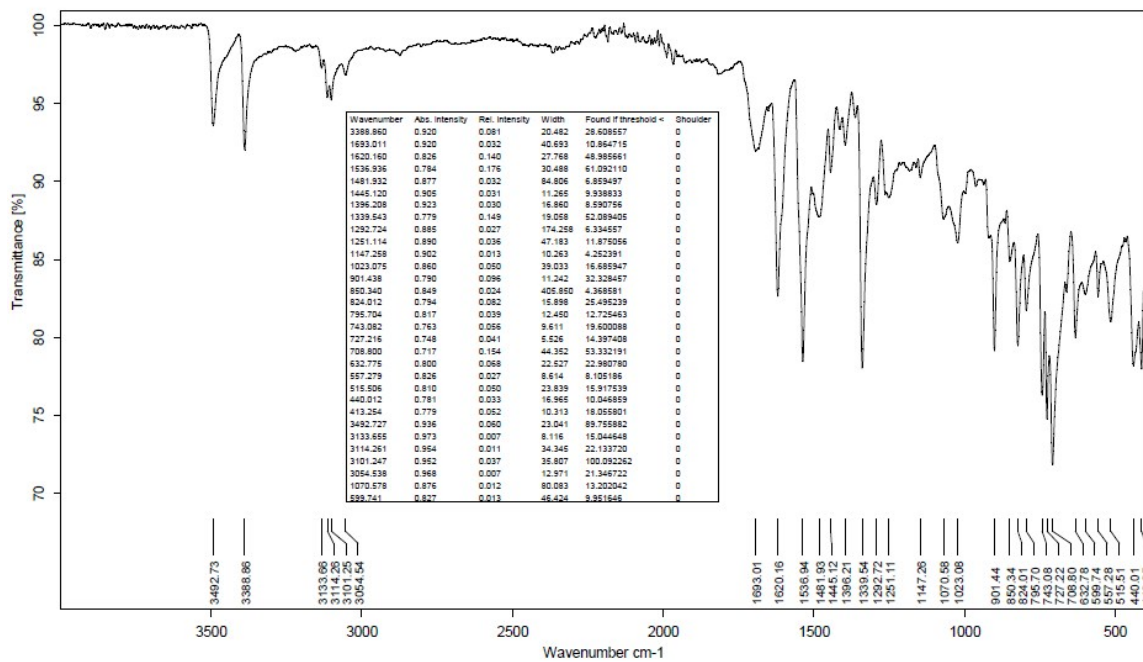

Figure S28 IR spectra of TNB:9-Anthroic acid:5-bromo-2-aminopyridine (6)

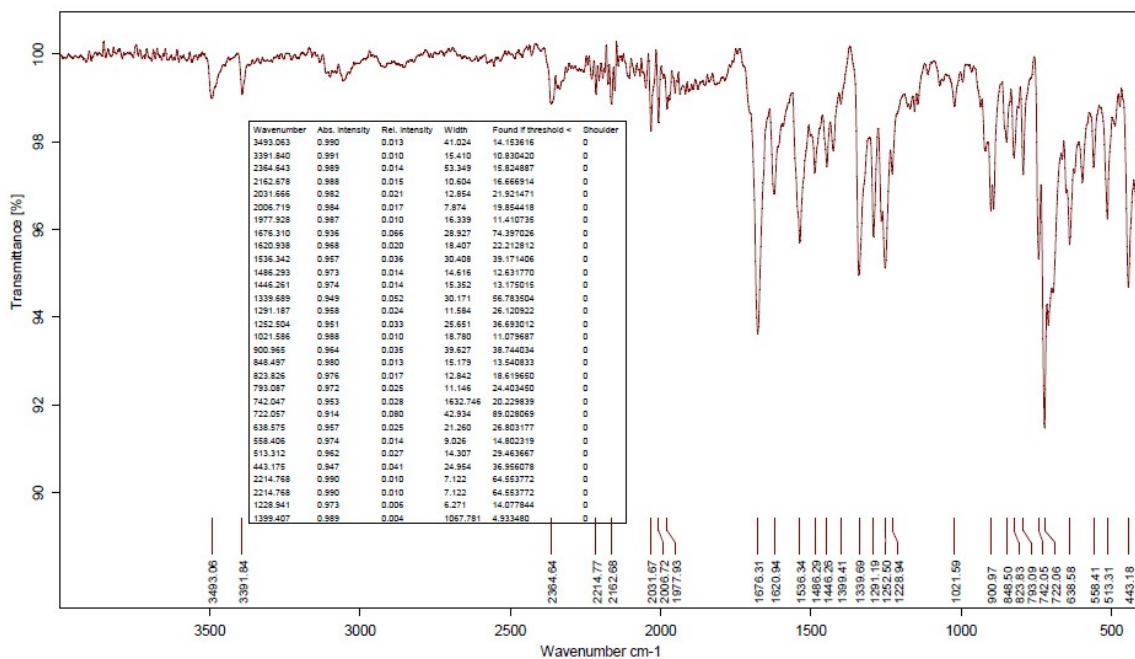

Figure S29 IR spectra of TNB:9-Anthroic acid:5-chloro-2-aminopyridine (7)

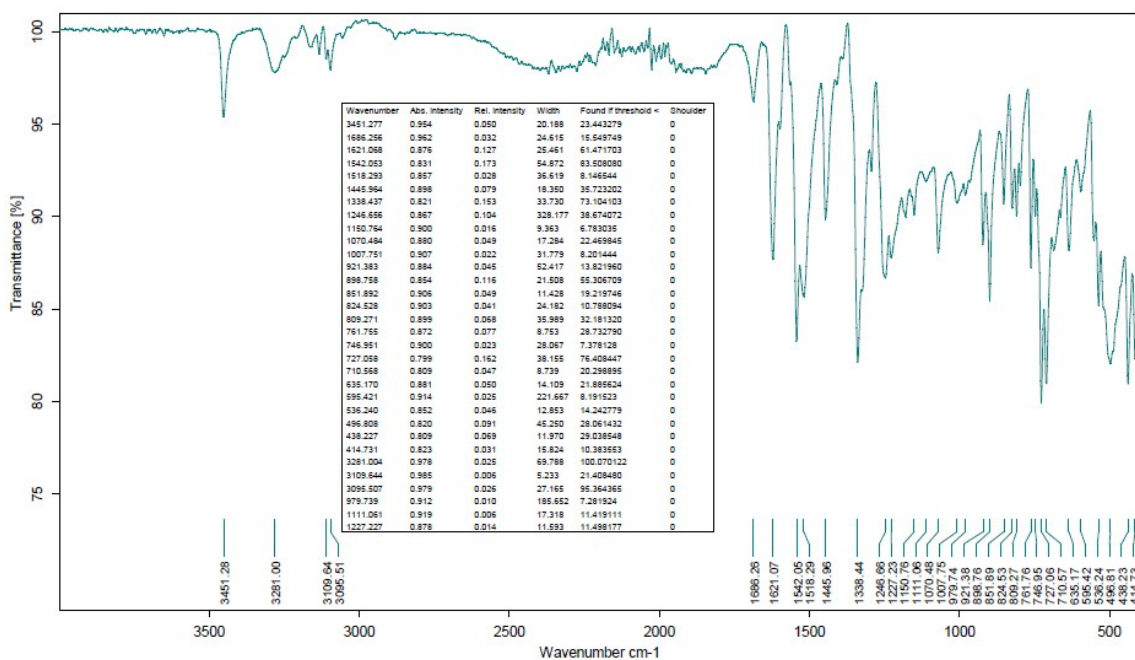

Figure S30 IR spectra of TNB:9-Anthroic acid:3-nitro-2-aminopyridine (8)

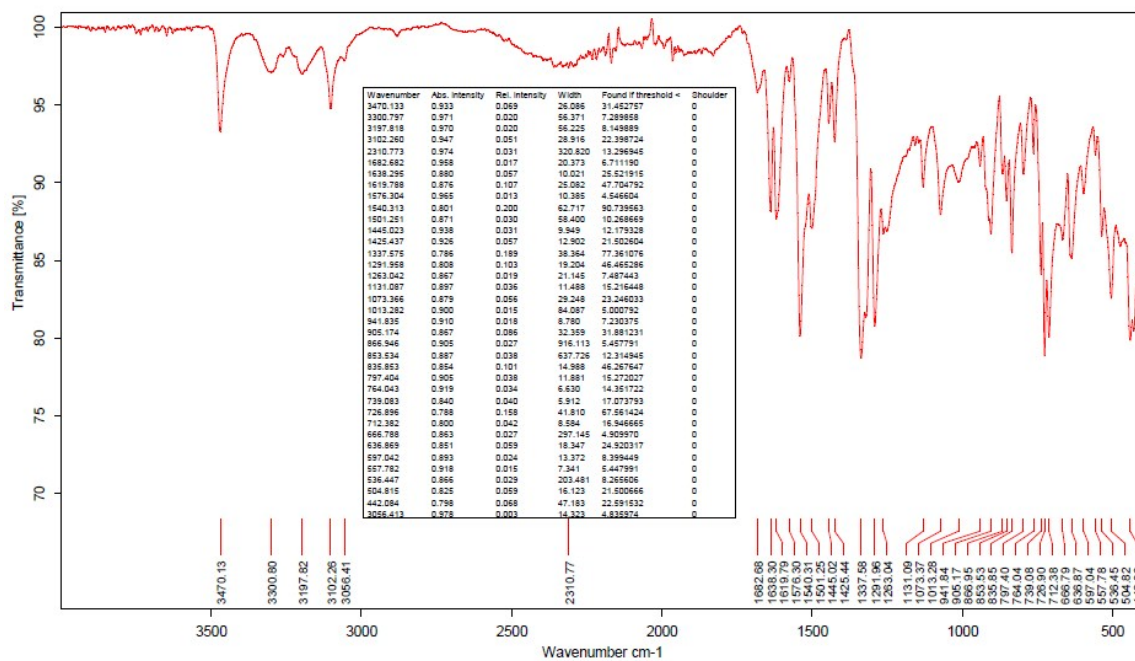

Figure S31 IR spectra of TNB:9-Anthroic acid:5-nitro-2-aminopyridine (9)

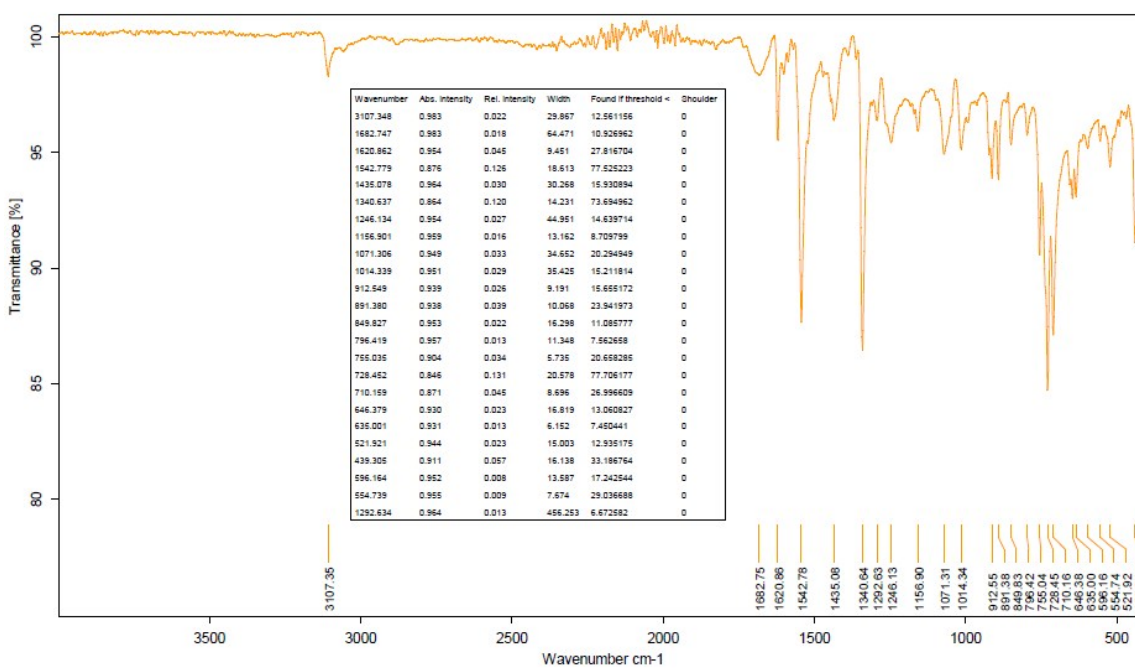

Figure S32 IR spectra of TNB:9-Anthroic acid:2,2'-dipyridyl (10)

## Diffuse Reflectance data for complexes 1 - 10

Diffuse reflectance spectra were collected at room temperature using a Praying Mantis DRS attachment with a Varian Cary 500 UV-Vis-NIR spectrophotometer. Each spectrum was scanned from 800 nm to 200 nm at 600 nm/min. The small step at 350 nm in some spectra is an instrumental artefact associated with a change in lamp source.

## Raman spectroscopic data for complexes 1 - 10

Raman spectra were acquired using the 785 nm line of a diode laser and a Horiba LabRAM HR Raman spectrometer equipped with an Olympus BX41 microscope attachment. The incident beam was focused onto the sample using a 100x objective (N.A. = 0.90) and the backscattered light was dispersed via a 600 lines/mm grating onto a liquid nitrogen cooled CCD detector. Spectral resolution was better than  $1\text{ cm}^{-1}$ . LabSpec v5 software was used to acquire and analyse the spectra. It was necessary to use 785 nm excitation, as 514.5 nm excitation gave intense background fluorescence for several samples. Due to detector range limitations, it was not possible to acquire Raman peaks above about  $2000\text{ cm}^{-1}$  with our instrument, so the Raman spectra do not show the C-H vibrations between  $2800\text{ cm}^{-1}$  and  $3200\text{ cm}^{-1}$ .

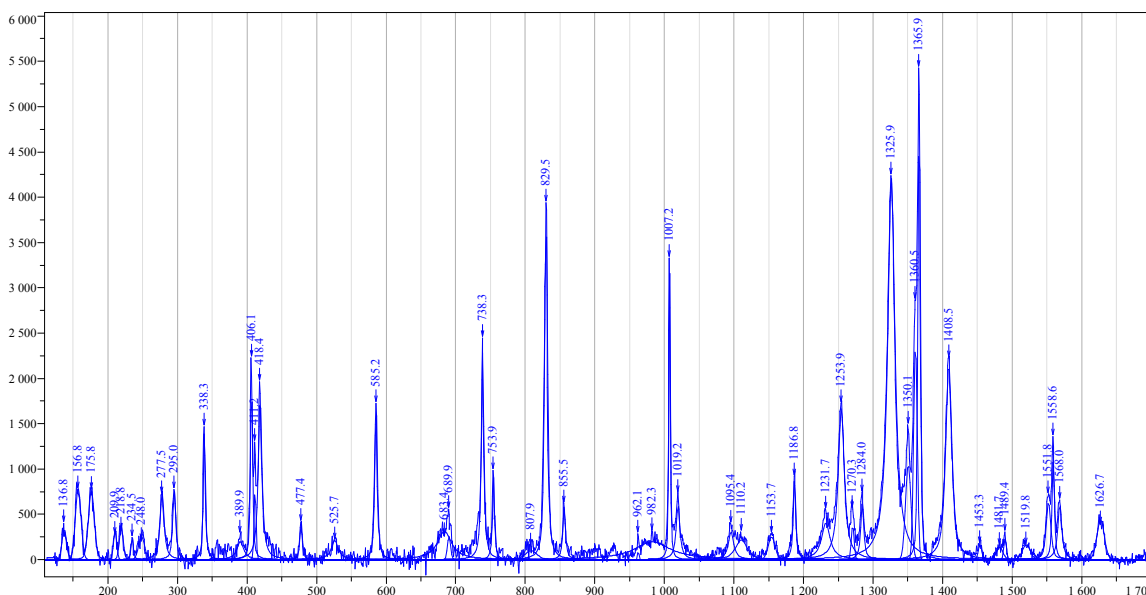

Figure S34 Raman spectrum of TNB:9-Anthroic acid:2-aminopyridine (1)

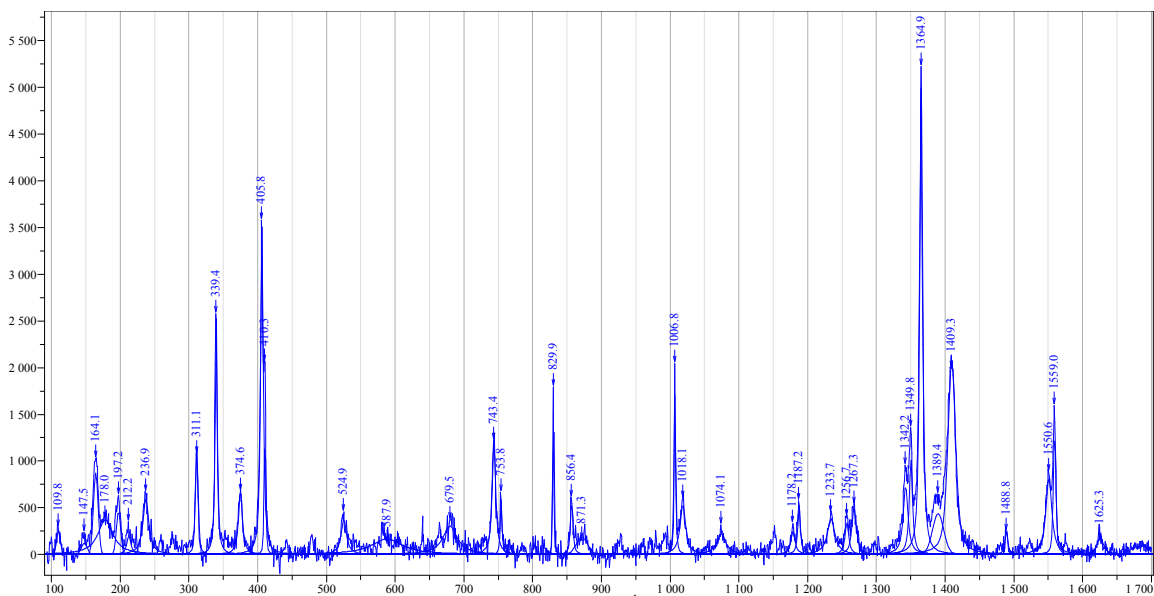

Figure S35 Raman spectrum of TNB:9-Anthroic acid:3-aminopyridine (2)

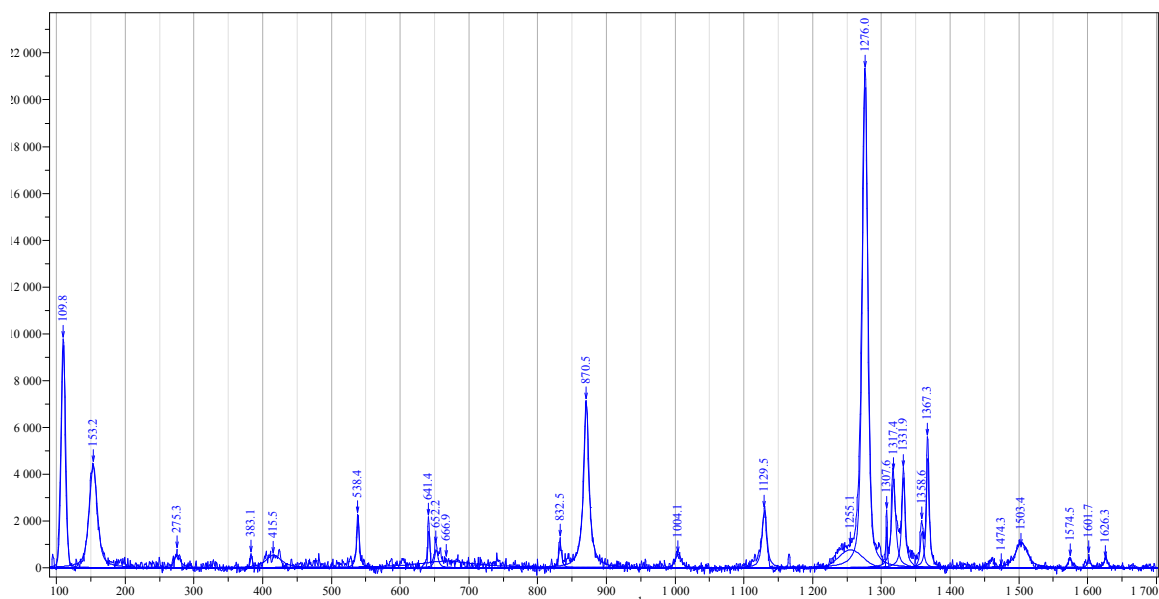

Figure S36 Raman spectrum of TNB:9-Anthroic acid:4-aminopyridine (3)



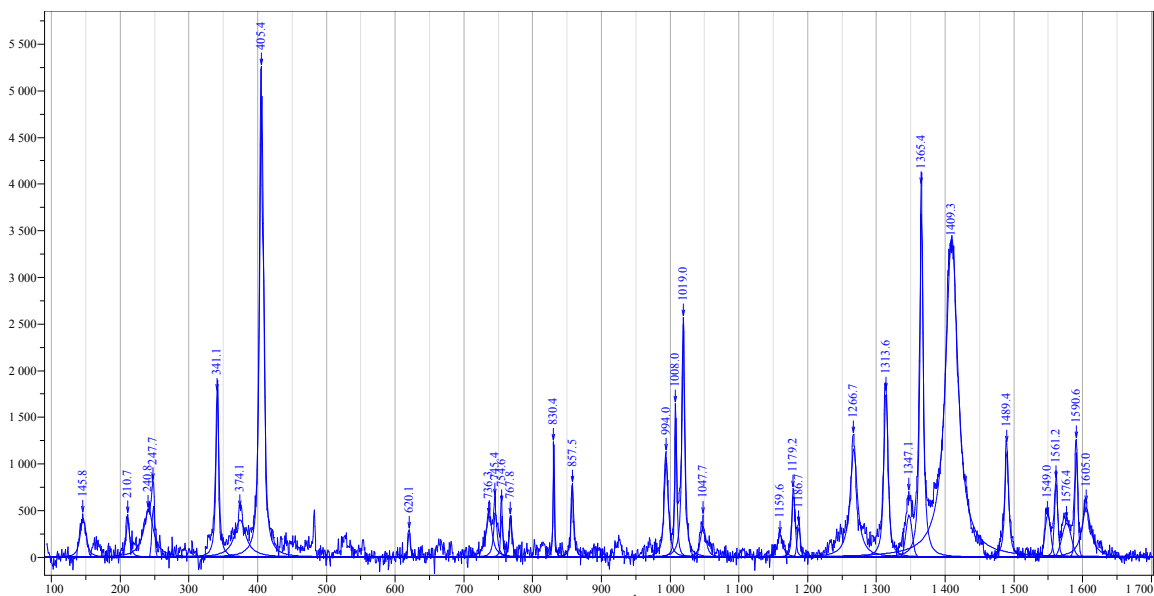

Figure S37 Raman spectrum of TNB:9-Anthroic acid:6-bromo-3-aminopyridine (4)

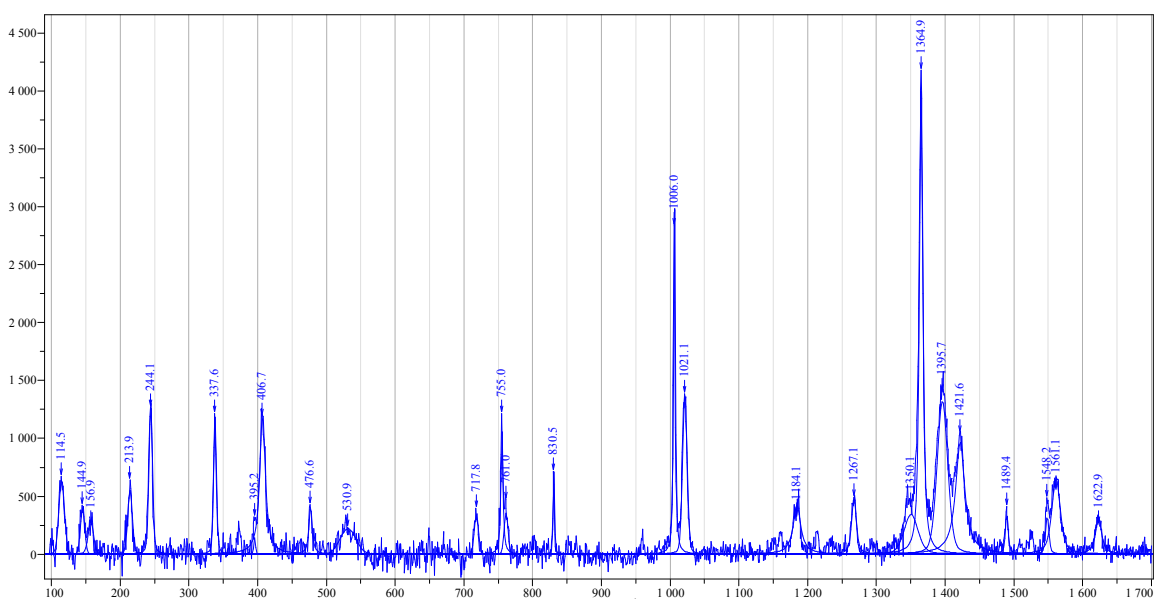

Figure S38 Raman spectrum of TNB:9-Anthroic acid:3-bromo-2-aminopyridine (5)

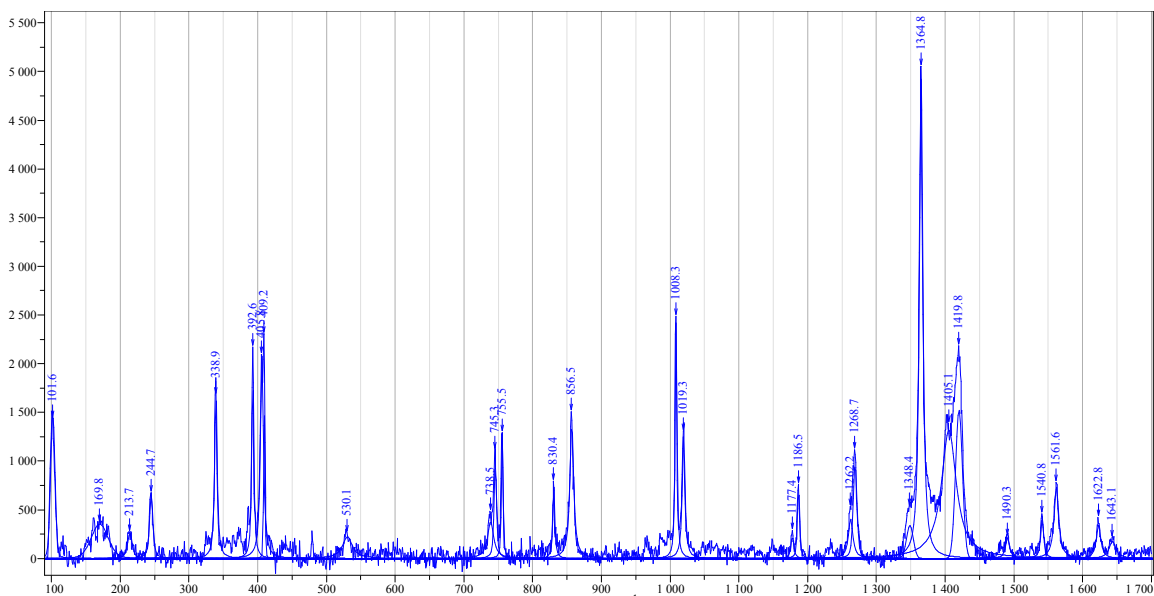

Figure S39 Raman spectrum of TNB:9-Anthroic acid:5-bromo-2-aminopyridine (6)

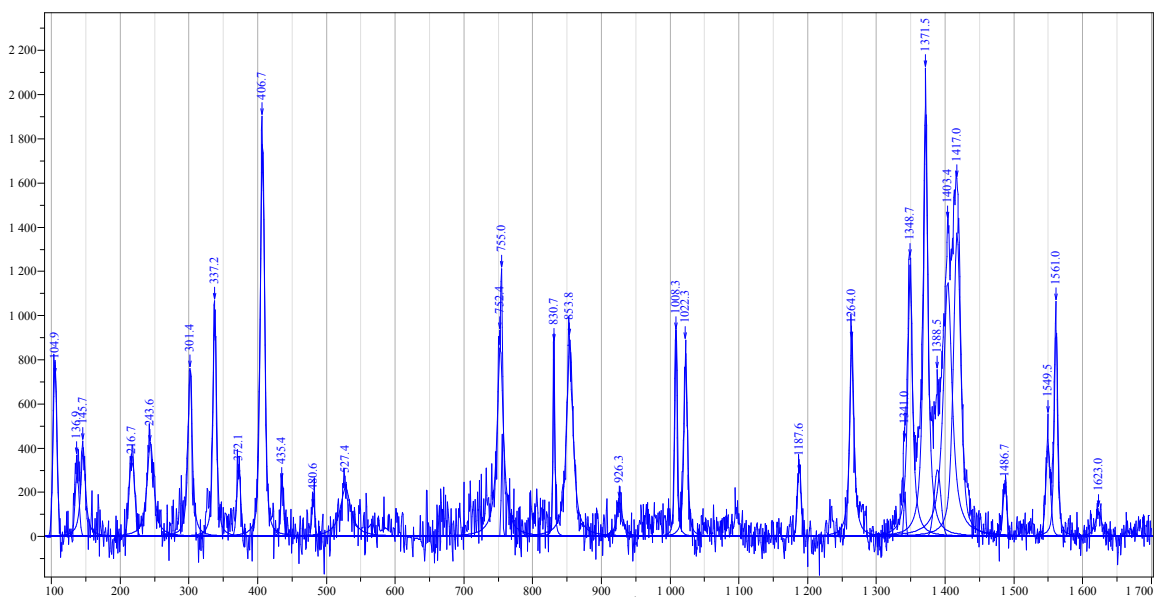

Figure S40 Raman spectrum of TNB:9-Anthroic acid:5-chloro-2-aminopyridine (7)

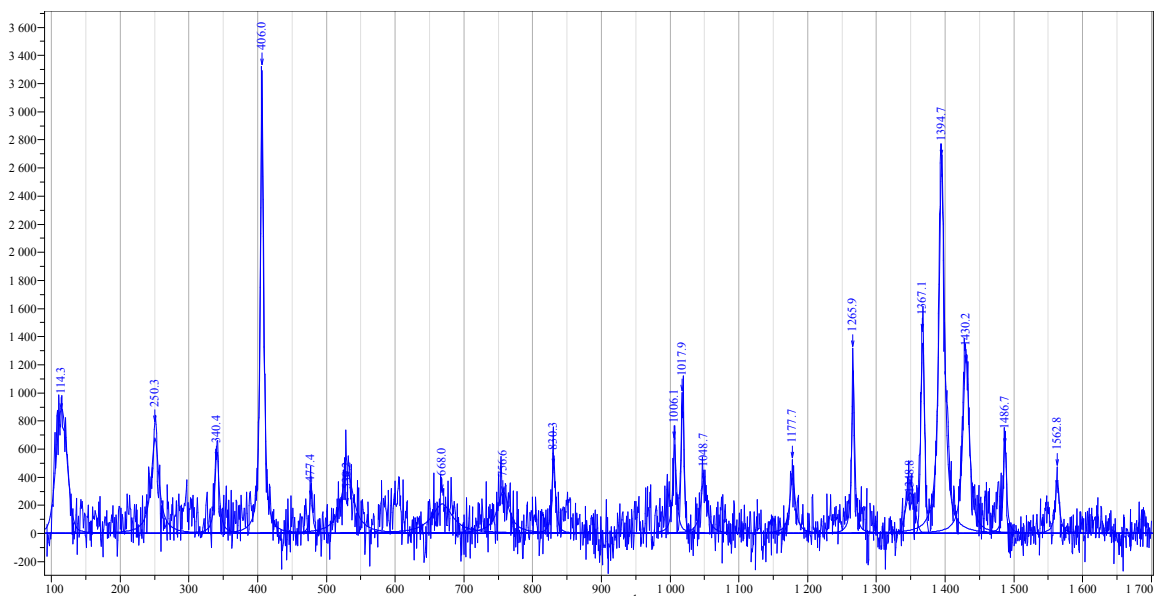

Figure S41 Raman spectrum of TNB:9-Anthroic acid:3-nitro-2-aminopyridine (8)

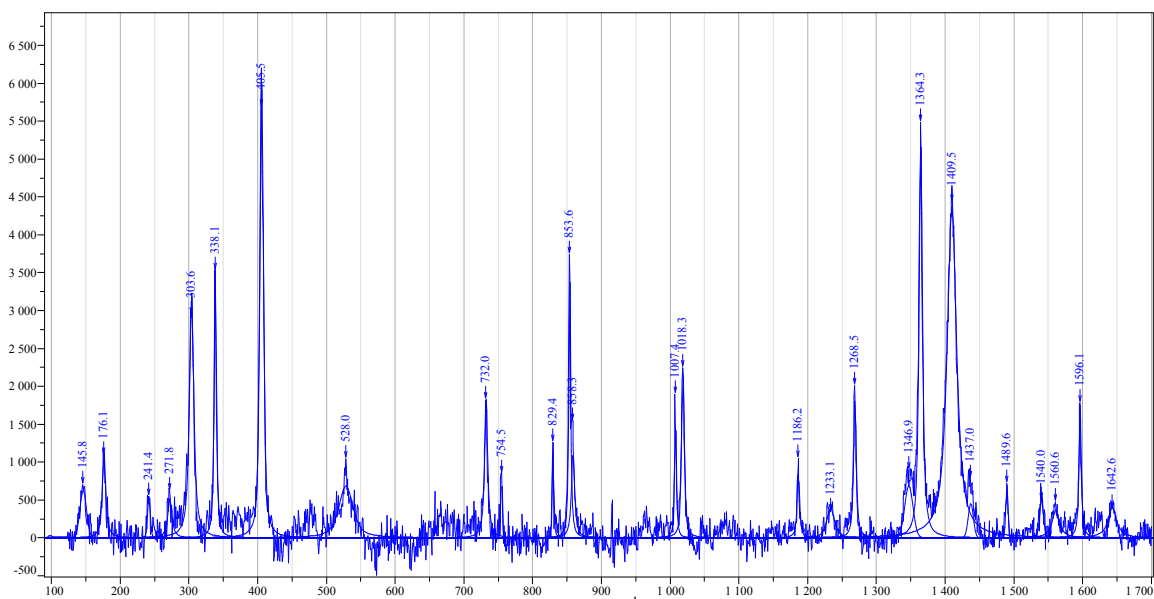

Figure S42 Raman spectrum of TNB:9-Anthroic acid:5-nitro-2-aminopyridine (9)

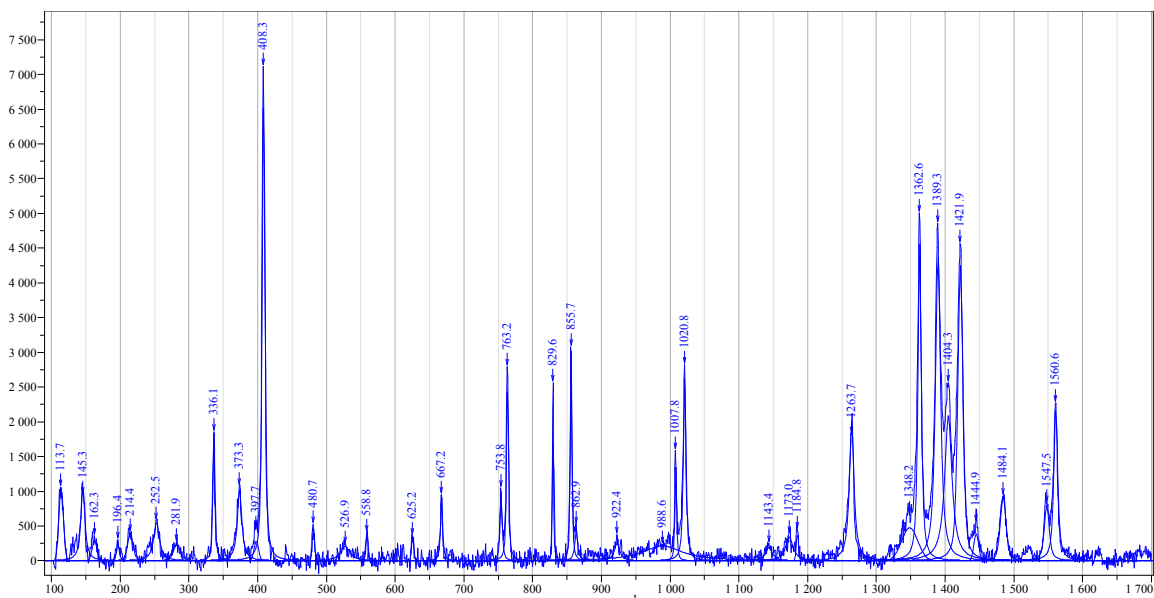

**Figure S43** Raman spectrum of TNB:9-Anthroic acid:2,2'-dipyridyl (**10**)
